# Supplementary material
Source: PubMed Central journal article supplement (PMC7611715)
Supplement: EMS110541-supplement-Supplementary_Material.pdf [file EMS110541-supplement-Supplementary_Material.pdf]

## Supplementary Material

### Figures

|                                                                                              |    |
|----------------------------------------------------------------------------------------------|----|
| Figure S1: Occupational groupings by (a) SOC2000 codes and (b) essential worker groups ..... | 2  |
| Figure S2: Risk of severe COVID-19 by broad race/occupation groups .....                     | 33 |

### Tables

|                                                                                                                                  |    |
|----------------------------------------------------------------------------------------------------------------------------------|----|
| Table S1: Occupation agreement between baseline and follow-up (first imaging visit only) by broad essential worker groups .....  | 4  |
| Table S2: Occupation agreement between baseline and follow-up (first imaging visit only) by narrow essential worker groups ..... | 5  |
| Table S3: Occupation agreement between baseline and follow-up (first imaging visit only) by SOC major occupational groups.....   | 6  |
| Table S4: Cohort characteristics by broad essential worker groups.....                                                           | 8  |
| Table S5: Descriptive statistics for severe COVID-19 by broad race/occupation groups .....                                       | 13 |
| Table S6: Risk of severe COVID-19 according to broad essential worker groups.....                                                | 14 |
| Table S7: Risk of severe COVID-19 according to narrow essential worker groups.....                                               | 19 |
| Table S8: Risk of severe COVID-19 according to SOC2000 major occupational groups .....                                           | 24 |
| Table S9: Risk of severe COVID-19 according to broad race/occupation groups .....                                                | 29 |

Figure S1: Occupational groupings by (a) SOC2000 codes and (b) essential worker groups

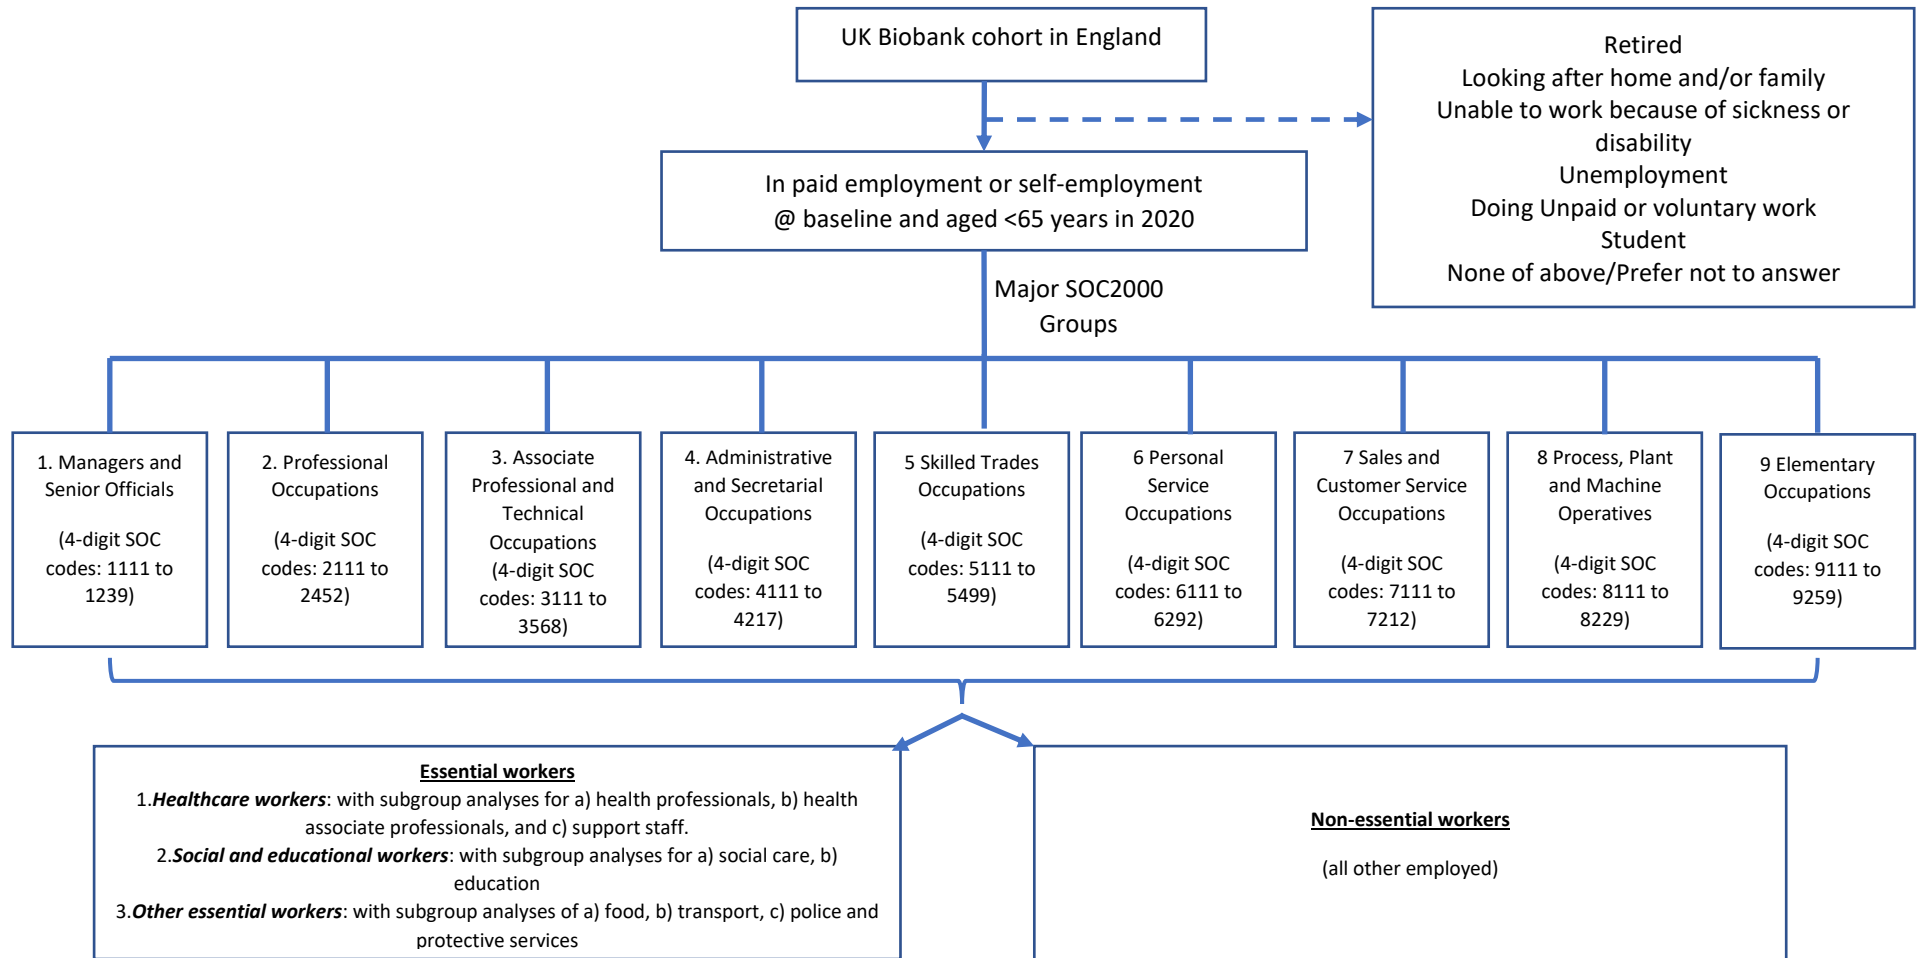

**Essential workers**

1. **Healthcare workers:** with subgroups for a) health professionals, b) health associate professionals, and c) support staff.  
 2. **Social and educational workers:** with subgroups for a) social care, b) education  
 3. **Other essential workers:** with subgroups for a) food, b) transport workers, c) police and protective services

**Healthcare workers**

**a) Health professionals**

2211 Medical practitioners  
 2212 Psychologists  
 2213 Pharmacists/pharmacologists

**b) Health associate professionals**

321 Health Associate Professionals  
 3211 Nurses  
 3212 Midwives  
 3213 Paramedics  
 3214 Medical radiographers  
 3215 Chiropodists  
 3216 Dispensing opticians  
 3217 Pharmaceutical dispensers  
 3218 Medical and dental technicians  
 1181 Hospital and health service managers  
 1182 Pharmacy managers  
 1183 Healthcare practice managers  
 322 Therapists  
 3221 Physiotherapists  
 3222 Occupational therapists  
 3223 Speech and language therapists  
 3229 Therapists n.e.c.

**c) support staff**

4211 Medical secretaries  
 6111 Nursing auxiliaries and assistants  
 6112 Ambulance staff (excluding paramedics)  
 9221 Hospital porters

**Social and educational workers**

**a) Social care**

1184 Social services managers  
 1185 Residential and day care managers  
 2442 Social workers  
 2444 Clergy  
 323 Social Welfare Associate Professionals  
 3231 Youth and community workers  
 3232 Housing and welfare officers  
 6114 Houseparents and residential wardens  
 6115 Care assistants and home carers  
 6232 Caretakers  
 6291 Undertakers and mortuary assistants  
 9229 Elementary personal services occupations n.e.c.

**a) Education**

231 Teaching Professionals  
 2314 Secondary education teaching professionals  
 2315 Primary and nursery education teaching professionals  
 2316 Special needs education teaching professionals  
 6121 Nursery nurses  
 6124 Educational assistants

**Other essential workers**

**a) Food**

1234 Shopkeepers and wholesale/retail dealers  
 543 Food Preparation Trades  
 5431 Butchers, meat cutters  
 5432 Bakers, flour confectioners  
 5433 Fishmongers, poultry dressers  
 7111 Sales and retail assistants  
 7112 Retail cashiers and check-out operators  
 925 Elementary Sales Occupations  
 9251 Shelf fillers  
 9259 Elementary sales occupations n.e.c.  
 116 Managers In Distribution, Storage And Retailing  
 1162 Storage and warehouse managers  
 1163 Retail and wholesale managers  
 8111 Food, drink and tobacco process operatives  
 1211 Farm managers  
 1219 Managers in animal husbandry, forestry and fishing n.e.c.  
 5111 Farmers  
 5112 Horticultural trades  
 5119 Agricultural and fishing trades n.e.c.  
 9111 Farm workers  
 9119 Fishing and agriculture related occupations n.e.c.

**b) Transport workers**

1161 Transport and distribution managers  
 3514 Train drivers  
 6215 Rail travel assistants  
 8211 Heavy goods vehicle drivers  
 8212 Van drivers  
 8213 Bus and coach drivers  
 8214 Taxi, cab drivers and chauffeurs  
 8216 Rail transport operatives  
 9211 Postal workers, mail sorters,

**c) Police & Protective Services (including sanitary workers)**

1172 Police officers (inspectors and above)  
 1173 Senior officers in fire, ambulance, prison and related services  
 1174 Security managers  
 331 Protective Service Occupations  
 3311 NCOs and other ranks  
 3312 Police officers (sergeant and below)  
 3313 Fire service officers (leading fire officer and below)  
 3314 Prison service officers (below principal officer)  
 3319 Protective service associate professionals n.e.c.  
 2443 Probation officers  
 9231 Window cleaners  
 9232 Road sweepers  
 9233 Cleaners, domestics  
 9235 Refuse and salvage occupations  
 9239 Elementary cleaning occupations n.e.c.

Table S1: Occupation agreement between baseline and follow-up (first imaging visit only) by broad essential worker groups

|                                  | Follow-up             |                    |                              |                         |        |
|----------------------------------|-----------------------|--------------------|------------------------------|-------------------------|--------|
| Baseline                         | Non-essential workers | Healthcare workers | Social and education workers | Other essential workers | Total  |
| Non-essential workers (N)        | 7,913                 | 160                | 235                          | 258                     | 8,566  |
| (%)                              | <b>92.38</b>          | 1.87               | 2.74                         | 3.01                    | 100    |
| Healthcare workers (N)           | 136                   | 1,295              | 42                           | 11                      | 1,484  |
| (%)                              | 9.16                  | <b>87.26</b>       | 2.83                         | 0.74                    | 100    |
| Social and education workers (N) | 225                   | 55                 | 1,120                        | 23                      | 1,423  |
| (%)                              | 15.81                 | 3.87               | <b>78.71</b>                 | 1.62                    | 100    |
| Other essential workers (N)      | 229                   | 15                 | 29                           | 546                     | 819    |
| (%)                              | 27.96                 | 1.83               | 3.54                         | <b>66.67</b>            | 100    |
| Total (N)                        | 8,503                 | 1,525              | 1,426                        | 838                     | 12,292 |
| (%)                              | 69.18                 | 12.41              | 11.6                         | 6.82                    | 100    |

Table S2: Occupation agreement between baseline and follow-up (first imaging visit only) by narrow essential worker groups

|                                                  | Follow-up             |                          |                       |                                |                     |                   |              |                   |                                       |        |
|--------------------------------------------------|-----------------------|--------------------------|-----------------------|--------------------------------|---------------------|-------------------|--------------|-------------------|---------------------------------------|--------|
| Baseline                                         | Non-essential workers | Healthcare professionals | Medical support staff | Health associate professionals | Social care workers | Education workers | Food workers | Transport workers | Police and protective service workers | Total  |
| <b>Non-essential workers (N)</b>                 | 7,913                 | 17                       | 38                    | 105                            | 122                 | 113               | 126          | 70                | 62                                    | 8,566  |
| (%)                                              | <b>92.38</b>          | 0.2                      | 0.44                  | 1.23                           | 1.42                | 1.32              | 1.47         | 0.82              | 0.72                                  | 100    |
| <b>Healthcare professionals (N)</b>              | 23                    | <b>282</b>               | 0                     | 9                              | 3                   | 0                 | 2            | 0                 | 0                                     | 319    |
| (%)                                              | 7.21                  | <b>88.4</b>              | 0                     | 2.82                           | 0.94                | 0                 | 0.63         | 0                 | 0                                     | 100    |
| <b>Medical support staff (N)</b>                 | 21                    | 1                        | 65                    | 11                             | 3                   | 1                 | 2            | 1                 | 0                                     | 105    |
| (%)                                              | 20                    | 0.95                     | <b>61.9</b>           | 10.48                          | 2.86                | 0.95              | 1.9          | 0.95              | 0                                     | 100    |
| <b>Health associate professionals (N)</b>        | 92                    | 25                       | 18                    | 884                            | 25                  | 10                | 5            | 0                 | 1                                     | 1,060  |
| (%)                                              | 8.68                  | 2.36                     | 1.7                   | <b>83.4</b>                    | 2.36                | 0.94              | 0.47         | 0                 | 0.09                                  | 100    |
| <b>Social care workers (N)</b>                   | 125                   | 1                        | 13                    | 23                             | 249                 | 14                | 2            | 4                 | 4                                     | 435    |
| (%)                                              | 28.74                 | 0.23                     | 2.99                  | 5.29                           | <b>57.24</b>        | 3.22              | 0.46         | 0.92              | 0.92                                  | 100    |
| <b>Education workers (N)</b>                     | 100                   | 2                        | 0                     | 16                             | 18                  | 839               | 6            | 2                 | 5                                     | 988    |
| (%)                                              | 10.12                 | 0.2                      | 0                     | 1.62                           | 1.82                | <b>84.92</b>      | 0.61         | 0.2               | 0.51                                  | 100    |
| <b>Food workers (N)</b>                          | 124                   | 0                        | 1                     | 5                              | 9                   | 2                 | 167          | 5                 | 0                                     | 313    |
| (%)                                              | 39.62                 | 0                        | 0.32                  | 1.6                            | 2.88                | 0.64              | <b>53.35</b> | 1.6               | 0                                     | 100    |
| <b>Transport workers (N)</b>                     | 43                    | 0                        | 3                     | 1                              | 2                   | 1                 | 4            | 145               | 2                                     | 201    |
| (%)                                              | 21.39                 | 0                        | 1.49                  | 0.5                            | 1                   | 0.5               | 1.99         | <b>72.14</b>      | 1                                     | 100    |
| <b>Police and protective service workers (N)</b> | 62                    | 0                        | 2                     | 3                              | 13                  | 2                 | 7            | 4                 | 212                                   | 305    |
| (%)                                              | 20.33                 | 0                        | 0.66                  | 0.98                           | 4.26                | 0.66              | 2.3          | 1.31              | <b>69.51</b>                          | 100    |
| <b>Total (N)</b>                                 | 8,503                 | 328                      | 140                   | 1,057                          | 444                 | 982               | 321          | 231               | 286                                   | 12,292 |
| (%)                                              | 69.18                 | 2.67                     | 1                     | 8.6                            | 3.61                | 7.99              | 3            | 1.88              | 2.33                                  | 100    |

Table S3: Occupation agreement between baseline and follow-up (first imaging visit only) by SOC major occupational groups

|                                                      | Follow-up                     |                          |                                                  |                                            |                            |                              |                                        |                                       |                        |       |
|------------------------------------------------------|-------------------------------|--------------------------|--------------------------------------------------|--------------------------------------------|----------------------------|------------------------------|----------------------------------------|---------------------------------------|------------------------|-------|
| Baseline                                             | Managers and Senior Officials | Professional Occupations | Associate Professional and Technical Occupations | Administrative and Secretarial Occupations | Skilled Trades Occupations | Personal Service Occupations | Sales and Customer Service Occupations | Process, Plant and Machine Operatives | Elementary Occupations | Total |
| Managers and Senior Officials (N)                    | 1,515                         | 276                      | 310                                              | 204                                        | 71                         | 46                           | 35                                     | 33                                    | 45                     | 2,535 |
| (%)                                                  | <b>59.76</b>                  | 10.89                    | 12.23                                            | 8.05                                       | 2.8                        | 1.81                         | 1.38                                   | 1.3                                   | 1.78                   | 100   |
| Professional Occupations (N)                         | 248                           | 2,626                    | 239                                              | 175                                        | 52                         | 40                           | 15                                     | 39                                    | 17                     | 3,451 |
| (%)                                                  | 7.19                          | <b>76.09</b>             | 6.93                                             | 5.07                                       | 1.51                       | 1.16                         | 0.43                                   | 1.13                                  | 0.49                   | 100   |
| Associate Professional and Technical Occupations (N) | 253                           | 229                      | 1,766                                            | 194                                        | 44                         | 75                           | 37                                     | 27                                    | 28                     | 2,653 |
| (%)                                                  | 9.54                          | 8.63                     | <b>66.57</b>                                     | <b>7.31</b>                                | 1.66                       | 2.83                         | 1.39                                   | 1.02                                  | 1.06                   | 100   |
| Administrative and Secretarial Occupations (N)       | 148                           | 91                       | 175                                              | 1,077                                      | 16                         | 32                           | 51                                     | 17                                    | 36                     | 1,643 |
| (%)                                                  | 9.01                          | 5.54                     | 10.65                                            | <b>65.55</b>                               | 0.97                       | 1.95                         | 3.1                                    | 1.03                                  | 2.19                   | 100   |
| Skilled Trades Occupations (N)                       | 41                            | 58                       | 42                                               | 4                                          | 381                        | 9                            | 7                                      | 30                                    | 30                     | 602   |
| (%)                                                  | 6.81                          | 9.63                     | 6.98                                             | 0.66                                       | <b>63.29</b>               | 1.5                          | <b>1.16</b>                            | 4.98                                  | 4.98                   | 100   |
| Personal Service Occupations (N)                     | 26                            | 63                       | 52                                               | 29                                         | 2                          | 377                          | 11                                     | 8                                     | 17                     | 585   |
| (%)                                                  | 4.44                          | 10.77                    | 8.89                                             | 4.96                                       | 0.34                       | <b>64.44</b>                 | 1.88                                   | 1.37                                  | 2.91                   | 100   |
| Sales and Customer Service Occupations (N)           | 27                            | 9                        | 23                                               | 35                                         | 5                          | 16                           | 115                                    | 3                                     | 18                     | 251   |
| (%)                                                  | 10.76                         | 3.59                     | 9.16                                             | 13.94                                      | 1.99                       | 6.37                         | <b>45.82</b>                           | 1.2                                   | 7.17                   | 100   |
| Process, Plant and Machine Operatives (N)            | 15                            | 23                       | 15                                               | 12                                         | 23                         | 4                            | 6                                      | 189                                   | 23                     | 310   |

|                            |       |       |       |       |      |      |      |              |              |        |
|----------------------------|-------|-------|-------|-------|------|------|------|--------------|--------------|--------|
| (%)                        | 4.84  | 7.42  | 4.84  | 3.87  | 7.42 | 1.29 | 1.94 | <b>60.97</b> | 7.42         | 100    |
| Elementary Occupations (N) | 17    | 4     | 18    | 15    | 25   | 16   | 11   | 20           | 136          | 262    |
| (%)                        | 6.49  | 1.53  | 6.87  | 5.73  | 9.54 | 6.11 | 4.2  | 7.63         | <b>51.91</b> | 100    |
| Total (N)                  | 2,290 | 3,379 | 2,640 | 1,745 | 619  | 615  | 288  | 366          | 350          | 12,292 |
| (%)                        | 18.63 | 27.49 | 21.48 | 14.2  | 5.04 | 5    | 2.34 | 2.98         | 2.85         | 100    |

Table S4: Cohort characteristics by broad essential worker groups

|                                     | Occupation (broad groups of essential workers) |                       |                    |                    |                              |                              |                         |                         |        |       |
|-------------------------------------|------------------------------------------------|-----------------------|--------------------|--------------------|------------------------------|------------------------------|-------------------------|-------------------------|--------|-------|
|                                     | Non-essential workers                          | Non-essential workers | Healthcare workers | Healthcare workers | Social and education workers | Social and education workers | Other essential workers | Other essential workers | Total  | Total |
|                                     | N                                              | %                     | N                  | %                  | N                            | %                            | N                       | %                       | N      | %     |
| <b>Age group (current)</b>          |                                                |                       |                    |                    |                              |                              |                         |                         |        |       |
| Under 55                            | 18,510                                         | 73.1                  | 2,049              | 8.1                | 2,454                        | 9.7                          | 2,302                   | 9.1                     | 25,315 | 100   |
| 55-59                               | 31,806                                         | 71.1                  | 4,016              | 9.0                | 4,728                        | 10.6                         | 4,184                   | 9.4                     | 44,734 | 100   |
| 60+                                 | 34,632                                         | 69.2                  | 4,683              | 9.4                | 6,294                        | 12.6                         | 4,417                   | 8.8                     | 50,026 | 100   |
| <b>Sex</b>                          |                                                |                       |                    |                    |                              |                              |                         |                         |        |       |
| Female                              | 41,199                                         | 63.3                  | 8,908              | 13.7               | 10,736                       | 16.5                         | 4,220                   | 6.5                     | 65,063 | 100   |
| Male                                | 43,749                                         | 79.5                  | 1,840              | 3.3                | 2,740                        | 5.0                          | 6,683                   | 12.1                    | 55,012 | 100   |
| <b>UK Biobank assessment centre</b> |                                                |                       |                    |                    |                              |                              |                         |                         |        |       |
| Manchester                          | 2,578                                          | 70.8                  | 369                | 10.1               | 398                          | 10.9                         | 296                     | 8.1                     | 3,641  | 100   |
| Oxford                              | 2,572                                          | 74.2                  | 326                | 9.4                | 336                          | 9.7                          | 234                     | 6.7                     | 3,468  | 100   |
| Stoke                               | 3,363                                          | 69.1                  | 383                | 7.9                | 563                          | 11.6                         | 561                     | 11.5                    | 4,870  | 100   |
| Reading                             | 6,238                                          | 77.4                  | 580                | 7.2                | 714                          | 8.9                          | 529                     | 6.6                     | 8,061  | 100   |
| Bury                                | 4,506                                          | 68.6                  | 588                | 9.0                | 794                          | 12.1                         | 676                     | 10.3                    | 6,564  | 100   |
| Newcastle                           | 6,470                                          | 67.7                  | 971                | 10.2               | 1,178                        | 12.3                         | 942                     | 9.9                     | 9,561  | 100   |
| Leeds                               | 8,534                                          | 69.8                  | 1,065              | 8.7                | 1,490                        | 12.2                         | 1,141                   | 9.3                     | 12,230 | 100   |
| Bristol                             | 9,495                                          | 71.9                  | 1,248              | 9.5                | 1,376                        | 10.4                         | 1,080                   | 8.2                     | 13,199 | 100   |



|                              |        |      |       |      |        |      |       |      |         |     |
|------------------------------|--------|------|-------|------|--------|------|-------|------|---------|-----|
| Barts                        | 3,107  | 78.6 | 296   | 7.5  | 313    | 7.9  | 239   | 6.0  | 3,955   | 100 |
| Nottingham                   | 5,978  | 69.9 | 790   | 9.2  | 950    | 11.1 | 836   | 9.8  | 8,554   | 100 |
| Sheffield                    | 5,615  | 67.3 | 874   | 10.5 | 1,056  | 12.6 | 804   | 9.6  | 8,349   | 100 |
| Liverpool                    | 5,713  | 68.1 | 769   | 9.2  | 1,041  | 12.4 | 872   | 10.4 | 8,395   | 100 |
| Middlesborough               | 3,672  | 65.0 | 582   | 10.3 | 715    | 12.7 | 682   | 12.1 | 5,651   | 100 |
| Hounslow                     | 6,244  | 76.5 | 559   | 6.9  | 718    | 8.8  | 636   | 7.8  | 8,157   | 100 |
| Croydon                      | 5,695  | 72.2 | 686   | 8.7  | 834    | 10.6 | 668   | 8.5  | 7,883   | 100 |
| Birmingham                   | 5,168  | 68.6 | 662   | 8.8  | 1,000  | 13.3 | 707   | 9.4  | 7,537   | 100 |
| <b>Ethnicity</b>             |        |      |       |      |        |      |       |      |         |     |
| White British                | 73,019 | 71.2 | 8,922 | 8.7  | 11,373 | 11.1 | 9,171 | 8.9  | 102,485 | 100 |
| White Irish                  | 2,235  | 69.7 | 389   | 12.1 | 366    | 11.4 | 215   | 6.7  | 3,205   | 100 |
| White Other                  | 3,740  | 75.2 | 420   | 8.4  | 463    | 9.3  | 351   | 7.1  | 4,974   | 100 |
| Mixed                        | 840    | 69.0 | 97    | 8.0  | 165    | 13.5 | 116   | 9.5  | 1,218   | 100 |
| South Asian                  | 2,047  | 66.6 | 289   | 9.4  | 274    | 8.9  | 465   | 15.1 | 3,075   | 100 |
| Black                        | 1,863  | 57.0 | 409   | 12.5 | 610    | 18.7 | 386   | 11.8 | 3,268   | 100 |
| Other                        | 1,204  | 65.1 | 222   | 12.0 | 225    | 12.2 | 199   | 10.8 | 1,850   | 100 |
| <b>Country of birth</b>      |        |      |       |      |        |      |       |      |         |     |
| UK & Ireland                 | 76,916 | 71.1 | 9,484 | 8.8  | 12,117 | 11.2 | 9,642 | 8.9  | 108,159 | 100 |
| Elsewhere                    | 8,032  | 67.4 | 1,264 | 10.6 | 1,359  | 11.4 | 1,261 | 10.6 | 11,916  | 100 |
| <b>Education level</b>       |        |      |       |      |        |      |       |      |         |     |
| College or University degree | 33,507 | 69.5 | 5,546 | 11.5 | 7,545  | 15.7 | 1,591 | 3.3  | 48,189  | 100 |

|                                   |        |      |       |      |        |      |       |      |         |     |
|-----------------------------------|--------|------|-------|------|--------|------|-------|------|---------|-----|
| A levels/AS levels or equivalent  | 12,534 | 75.4 | 1,462 | 8.8  | 1,341  | 8.1  | 1,292 | 7.8  | 16,629  | 100 |
| O levels/GCSEs/CSEs or equivalent | 29,083 | 73.2 | 2,113 | 5.3  | 2,976  | 7.5  | 5,558 | 14.0 | 39,730  | 100 |
| Other                             | 6,437  | 63.4 | 1,538 | 15.1 | 1,385  | 13.6 | 797   | 7.8  | 10,157  | 100 |
| None of the above                 | 3,387  | 63.1 | 89    | 1.7  | 229    | 4.3  | 1,665 | 31.0 | 5,370   | 100 |
| <b>Deprivation quartile</b>       |        |      |       |      |        |      |       |      |         |     |
| Quartile 1 (most advantaged)      | 20,677 | 72.6 | 2,719 | 9.5  | 3,059  | 10.7 | 2,033 | 7.1  | 28,488  | 100 |
| Quartile 2                        | 20,523 | 71.7 | 2,671 | 9.3  | 3,087  | 10.8 | 2,345 | 8.2  | 28,626  | 100 |
| Quartile 3                        | 22,404 | 70.4 | 2,827 | 8.9  | 3,658  | 11.5 | 2,913 | 9.2  | 31,802  | 100 |
| Quartile 4 (least advantaged)     | 21,344 | 68.5 | 2,531 | 8.1  | 3,672  | 11.8 | 3,612 | 11.6 | 31,159  | 100 |
| <b>Shiftwork</b>                  |        |      |       |      |        |      |       |      |         |     |
| No                                | 78,949 | 73.7 | 8,253 | 7.7  | 11,971 | 11.2 | 7,899 | 7.4  | 107,072 | 100 |
| Yes                               | 5,999  | 46.1 | 2,495 | 19.2 | 1,505  | 11.6 | 3,004 | 23.1 | 13,003  | 100 |
| <b>Manual occupation</b>          |        |      |       |      |        |      |       |      |         |     |
| Non-manual                        | 74,849 | 72.2 | 9,097 | 8.8  | 12,211 | 11.8 | 7,477 | 7.2  | 103,634 | 100 |
| Manual                            | 10,099 | 61.4 | 1,651 | 10.0 | 1,265  | 7.7  | 3,426 | 20.8 | 16,441  | 100 |
| <b>Job tenure</b>                 |        |      |       |      |        |      |       |      |         |     |
| <=10                              | 49,625 | 70.0 | 6,212 | 8.8  | 8,853  | 12.5 | 6,206 | 8.8  | 70,896  | 100 |
| 11-20                             | 19,420 | 70.5 | 2,631 | 9.5  | 3,055  | 11.1 | 2,446 | 8.9  | 27,552  | 100 |
| >20                               | 15,903 | 73.5 | 1,905 | 8.8  | 1,568  | 7.3  | 2,251 | 10.4 | 21,627  | 100 |

|                                                       |        |      |       |      |        |      |       |      |        |     |
|-------------------------------------------------------|--------|------|-------|------|--------|------|-------|------|--------|-----|
| <b>Working hours</b>                                  |        |      |       |      |        |      |       |      |        |     |
| <40                                                   | 41,380 | 66.8 | 7,374 | 11.9 | 8,486  | 13.7 | 4,706 | 7.6  | 61,946 | 100 |
| 40-45                                                 | 29,380 | 76.8 | 2,330 | 6.1  | 3,174  | 8.3  | 3,395 | 8.9  | 38,279 | 100 |
| >45                                                   | 14,188 | 71.5 | 1,044 | 5.3  | 1,816  | 9.1  | 2,802 | 14.1 | 19,850 | 100 |
| <b>Number of chronic conditions</b>                   |        |      |       |      |        |      |       |      |        |     |
| 0                                                     | 44,022 | 71.9 | 5,356 | 8.7  | 6,417  | 10.5 | 5,449 | 8.9  | 61,244 | 100 |
| 1                                                     | 27,162 | 70.5 | 3,443 | 8.9  | 4,425  | 11.5 | 3,496 | 9.1  | 38,526 | 100 |
| 2                                                     | 9,820  | 68.3 | 1,349 | 9.4  | 1,816  | 12.6 | 1,389 | 9.7  | 14,374 | 100 |
| 3                                                     | 2,916  | 67.5 | 427   | 9.9  | 573    | 13.3 | 403   | 9.3  | 4,319  | 100 |
| 4+                                                    | 1,028  | 63.8 | 173   | 10.7 | 245    | 15.2 | 166   | 10.3 | 1,612  | 100 |
| <b>Long-standing illness, disability or infirmity</b> |        |      |       |      |        |      |       |      |        |     |
| No                                                    | 67,132 | 71.1 | 8,484 | 9.0  | 10,427 | 11.0 | 8,367 | 8.9  | 94,410 | 100 |
| Yes                                                   | 17,816 | 69.4 | 2,264 | 8.8  | 3,049  | 11.9 | 2,536 | 9.9  | 25,665 | 100 |
| <b>BMI Category</b>                                   |        |      |       |      |        |      |       |      |        |     |
| Underweight (<18.5)                                   | 411    | 67.0 | 63    | 10.3 | 92     | 15.0 | 47    | 7.7  | 613    | 100 |
| Normal weight (18.5-24.9)                             | 31,078 | 69.8 | 4,845 | 10.9 | 5,536  | 12.4 | 3,037 | 6.8  | 44,496 | 100 |
| Overweight (25.0-29.9)                                | 35,289 | 72.4 | 3,841 | 7.9  | 4,862  | 10.0 | 4,761 | 9.8  | 48,753 | 100 |
| Obese (>=30.0)                                        | 18,170 | 69.3 | 1,999 | 7.6  | 2,986  | 11.4 | 3,058 | 11.7 | 26,213 | 100 |
| <b>Smoking status</b>                                 |        |      |       |      |        |      |       |      |        |     |
| Never                                                 | 52,308 | 70.3 | 7,154 | 9.6  | 8,688  | 11.7 | 6,236 | 8.4  | 74,386 | 100 |

|                            |               |             |               |            |               |             |               |            |                |            |
|----------------------------|---------------|-------------|---------------|------------|---------------|-------------|---------------|------------|----------------|------------|
| Previous                   | 22,660        | 71.5        | 2,733         | 8.6        | 3,395         | 10.7        | 2,896         | 9.1        | 31,684         | 100        |
| Current                    | 9,980         | 71.3        | 861           | 6.1        | 1,393         | 9.9         | 1,771         | 12.6       | 14,005         | 100        |
| <b>Alcohol consumption</b> |               |             |               |            |               |             |               |            |                |            |
| Daily or almost daily      | 15,272        | 76.1        | 1,473         | 7.3        | 1,765         | 8.8         | 1,570         | 7.8        | 20,080         | 100        |
| Three or four times a week | 22,155        | 74.0        | 2,747         | 9.2        | 2,976         | 9.9         | 2,064         | 6.9        | 29,942         | 100        |
| Once or twice a week       | 25,038        | 71.0        | 3,033         | 8.6        | 3,866         | 11.0        | 3,336         | 9.5        | 35,273         | 100        |
| One to three times a month | 10,686        | 67.7        | 1,522         | 9.6        | 1,969         | 12.5        | 1,602         | 10.2       | 15,779         | 100        |
| Special occasions only     | 7,558         | 63.1        | 1,214         | 10.1       | 1,819         | 15.2        | 1,394         | 11.6       | 11,985         | 100        |
| Never (former drinker)     | 1,902         | 63.8        | 283           | 9.5        | 423           | 14.2        | 371           | 12.5       | 2,979          | 100        |
| Never                      | 2,337         | 57.9        | 476           | 11.8       | 658           | 16.3        | 566           | 14.0       | 4,037          | 100        |
| <b>Total</b>               | <b>84,948</b> | <b>70.7</b> | <b>10,748</b> | <b>9.0</b> | <b>13,476</b> | <b>11.2</b> | <b>10,903</b> | <b>9.1</b> | <b>120,075</b> | <b>100</b> |

**Table S5: Descriptive statistics for severe COVID-19 by broad race/occupation groups**

|                                  | Severe COVID-19 |             |            |            | Total          | Total      |
|----------------------------------|-----------------|-------------|------------|------------|----------------|------------|
|                                  | No              |             | Yes        |            |                |            |
|                                  | N               | %           | N          | %          | N              | %          |
| White (non-essential worker)     | 78,902          | 99.9        | 92         | 0.1        | 78,994         | 100        |
| Non-white (non-essential worker) | 5,934           | 99.7        | 20         | 0.3        | 5,954          | 100        |
| White (essential worker)         | 31,541          | 99.6        | 129        | 0.4        | 31,670         | 100        |
| Non-white (essential worker)     | 3,427           | 99.1        | 30         | 0.9        | 3,457          | 100        |
| <b>Total</b>                     | <b>119,804</b>  | <b>99.8</b> | <b>271</b> | <b>0.2</b> | <b>120,075</b> | <b>100</b> |

Table S6: Risk of severe COVID-19 according to broad essential worker groups

|                                          | <b>Model 1</b>  | <b>Model 2</b>  | <b>Model 3</b>  | <b>Model 4</b>  | <b>Model 5</b>  | <b>Model 6</b>  |
|------------------------------------------|-----------------|-----------------|-----------------|-----------------|-----------------|-----------------|
| <b>Severe COVID-19</b>                   | <b>RR</b>       | <b>RR</b>       | <b>RR</b>       | <b>RR</b>       | <b>RR</b>       | <b>RR</b>       |
|                                          | <b>[95% CI]</b> |
| <b>Occupation: Non-essential workers</b> | 1.00            | 1.00            | 1.00            | 1.00            | 1.00            | 1.00            |
|                                          | -               | -               | -               | -               | -               | -               |
| Healthcare workers                       | 7.43***         | 8.45***         | 7.57***         | 8.44***         | 8.53***         | 7.69***         |
|                                          | [5.52,10.00]    | [6.22,11.47]    | [5.50,10.41]    | [6.21,11.46]    | [6.29,11.58]    | [5.58,10.60]    |
| Social and education workers             | 1.84**          | 2.00**          | 1.90**          | 1.99**          | 1.97**          | 1.88**          |
|                                          | [1.21,2.82]     | [1.30,3.08]     | [1.22,2.94]     | [1.29,3.06]     | [1.28,3.03]     | [1.21,2.91]     |
| Other essential workers                  | 1.60*           | 1.30            | 1.17            | 1.30            | 1.27            | 1.15            |
|                                          | [1.05,2.45]     | [0.85,1.98]     | [0.76,1.80]     | [0.85,1.98]     | [0.83,1.94]     | [0.75,1.77]     |
| <b>Age group (current): Under 55</b>     | 1.00            | 1.00            | 1.00            | 1.00            | 1.00            | 1.00            |
|                                          | -               | -               | -               | -               | -               | -               |
| 55-59                                    | 1.06            | 1.05            | 1.08            | 1.05            | 1.05            | 1.08            |
|                                          | [0.79,1.43]     | [0.78,1.42]     | [0.80,1.46]     | [0.77,1.41]     | [0.78,1.42]     | [0.80,1.45]     |
| 60+                                      | 0.64**          | 0.63**          | 0.67*           | 0.62**          | 0.62**          | 0.65*           |
|                                          | [0.46,0.89]     | [0.45,0.88]     | [0.48,0.94]     | [0.45,0.87]     | [0.45,0.86]     | [0.47,0.91]     |
| <b>Sex: Female</b>                       | 1.00            | 1.00            | 1.00            | 1.00            | 1.00            | 1.00            |
|                                          | -               | -               | -               | -               | -               | -               |
| Male                                     | 1.38*           | 1.41*           | 1.35*           | 1.41*           | 1.36*           | 1.31            |
|                                          | [1.05,1.80]     | [1.08,1.84]     | [1.01,1.79]     | [1.08,1.85]     | [1.04,1.79]     | [0.98,1.75]     |
| <b>Assessment centre: Manchester</b>     | 0.73            | 0.74            | 0.75            | 0.74            | 0.75            | 0.77            |
|                                          | [0.39,1.37]     | [0.39,1.40]     | [0.40,1.41]     | [0.39,1.40]     | [0.39,1.42]     | [0.40,1.46]     |
| Oxford                                   | 0.70            | 0.78            | 0.78            | 0.78            | 0.81            | 0.81            |
|                                          | [0.35,1.40]     | [0.39,1.56]     | [0.39,1.55]     | [0.39,1.57]     | [0.40,1.62]     | [0.41,1.63]     |
| Stoke                                    | 0.63            | 0.66            | 0.65            | 0.67            | 0.66            | 0.65            |
|                                          | [0.33,1.20]     | [0.35,1.25]     | [0.35,1.23]     | [0.35,1.26]     | [0.35,1.24]     | [0.35,1.23]     |
| Reading                                  | 0.41**          | 0.50*           | 0.50*           | 0.51*           | 0.51*           | 0.51*           |
|                                          | [0.22,0.77]     | [0.27,0.95]     | [0.27,0.95]     | [0.27,0.96]     | [0.27,0.96]     | [0.27,0.97]     |
| Bury                                     | 0.49*           | 0.50*           | 0.50*           | 0.51*           | 0.50*           | 0.51*           |
|                                          | [0.27,0.90]     | [0.27,0.92]     | [0.27,0.92]     | [0.28,0.93]     | [0.27,0.92]     | [0.27,0.93]     |
| Newcastle                                | 1.00            | 1.00            | 1.00            | 1.00            | 1.00            | 1.00            |
|                                          | -               | -               | -               | -               | -               | -               |
| Leeds                                    | 0.38***         | 0.41***         | 0.41**          | 0.41**          | 0.41***         | 0.41**          |

|                                           |                        |                        |                        |                        |                        |                        |
|-------------------------------------------|------------------------|------------------------|------------------------|------------------------|------------------------|------------------------|
|                                           | [0.22,0.65]            | [0.24,0.69]            | [0.24,0.70]            | [0.24,0.70]            | [0.24,0.69]            | [0.24,0.70]            |
| Bristol                                   | 0.24***<br>[0.13,0.45] | 0.27***<br>[0.14,0.50] | 0.27***<br>[0.14,0.50] | 0.27***<br>[0.14,0.50] | 0.27***<br>[0.14,0.51] | 0.27***<br>[0.14,0.51] |
| Barts                                     | 0.20**<br>[0.07,0.55]  | 0.18**<br>[0.06,0.50]  | 0.19**<br>[0.07,0.53]  | 0.18**<br>[0.06,0.51]  | 0.19**<br>[0.07,0.53]  | 0.19**<br>[0.07,0.55]  |
| Nottingham                                | 0.30***<br>[0.15,0.58] | 0.32***<br>[0.17,0.63] | 0.33***<br>[0.17,0.63] | 0.32***<br>[0.17,0.63] | 0.33**<br>[0.17,0.64]  | 0.33**<br>[0.17,0.64]  |
| Sheffield                                 | 0.80<br>[0.50,1.28]    | 0.83<br>[0.52,1.32]    | 0.84<br>[0.53,1.34]    | 0.83<br>[0.52,1.32]    | 0.83<br>[0.52,1.33]    | 0.85<br>[0.53,1.36]    |
| Liverpool                                 | 0.86<br>[0.54,1.37]    | 0.87<br>[0.55,1.38]    | 0.88<br>[0.55,1.40]    | 0.87<br>[0.55,1.39]    | 0.85<br>[0.53,1.36]    | 0.87<br>[0.55,1.39]    |
| Middlesborough                            | 0.45*<br>[0.23,0.87]   | 0.47*<br>[0.24,0.92]   | 0.48*<br>[0.25,0.93]   | 0.47*<br>[0.24,0.92]   | 0.46*<br>[0.24,0.90]   | 0.47*<br>[0.24,0.92]   |
| Hounslow                                  | 0.37**<br>[0.21,0.68]  | 0.37**<br>[0.20,0.67]  | 0.37**<br>[0.20,0.69]  | 0.37**<br>[0.20,0.68]  | 0.37**<br>[0.20,0.69]  | 0.39**<br>[0.21,0.71]  |
| Croydon                                   | 0.36***<br>[0.20,0.64] | 0.36***<br>[0.20,0.64] | 0.37***<br>[0.21,0.67] | 0.36***<br>[0.20,0.65] | 0.36***<br>[0.20,0.64] | 0.37**<br>[0.21,0.67]  |
| Birmingham                                | 0.40**<br>[0.22,0.72]  | 0.39**<br>[0.21,0.70]  | 0.40**<br>[0.22,0.73]  | 0.39**<br>[0.21,0.70]  | 0.38**<br>[0.21,0.69]  | 0.40**<br>[0.22,0.72]  |
| <b>Ethnicity: White British</b>           | 1.00<br>-              | 1.00<br>-              | 1.00<br>-              | 1.00<br>-              | 1.00<br>-              | 1.00<br>-              |
| White Irish                               | 1.54<br>[0.82,2.89]    | 1.58<br>[0.84,2.96]    | 1.59<br>[0.85,2.97]    | 1.58<br>[0.84,2.95]    | 1.58<br>[0.84,2.98]    | 1.59<br>[0.85,2.98]    |
| White Other                               | 1.19<br>[0.60,2.35]    | 1.25<br>[0.63,2.49]    | 1.27<br>[0.64,2.52]    | 1.25<br>[0.63,2.48]    | 1.23<br>[0.62,2.44]    | 1.24<br>[0.62,2.46]    |
| Mixed                                     | 1.44<br>[0.46,4.49]    | 1.37<br>[0.44,4.29]    | 1.36<br>[0.43,4.25]    | 1.38<br>[0.44,4.30]    | 1.33<br>[0.43,4.12]    | 1.32<br>[0.42,4.11]    |
| South Asian                               | 3.94***<br>[2.24,6.93] | 3.78***<br>[2.14,6.70] | 3.80***<br>[2.14,6.76] | 3.77***<br>[2.12,6.71] | 3.94***<br>[2.24,6.94] | 4.00***<br>[2.26,7.07] |
| Black                                     | 3.57***<br>[2.14,5.96] | 3.01***<br>[1.80,5.04] | 2.93***<br>[1.74,4.92] | 3.00***<br>[1.79,5.01] | 2.78***<br>[1.65,4.68] | 2.73***<br>[1.61,4.62] |
| Other                                     | 1.49<br>[0.60,3.66]    | 1.38<br>[0.56,3.45]    | 1.32<br>[0.53,3.28]    | 1.39<br>[0.56,3.45]    | 1.42<br>[0.57,3.49]    | 1.36<br>[0.55,3.36]    |
| <b>Country of birth: UK &amp; Ireland</b> | 1.00<br>-              | 1.00<br>-              | 1.00<br>-              | 1.00<br>-              | 1.00<br>-              | 1.00<br>-              |
| Elsewhere                                 | 0.90                   | 0.91                   | 0.85                   | 0.92                   | 0.91                   | 0.87                   |

|                                                                   |             |                        |                       |                        |                       |                       |
|-------------------------------------------------------------------|-------------|------------------------|-----------------------|------------------------|-----------------------|-----------------------|
|                                                                   | [0.59,1.37] | [0.59,1.40]            | [0.55,1.33]           | [0.60,1.41]            | [0.59,1.41]           | [0.56,1.36]           |
| <b>Socioeconomic deprivation:</b> Quartile 1<br>(most advantaged) |             | 1.00<br>-              | 1.00<br>-             | 1.00<br>-              | 1.00<br>-             | 1.00<br>-             |
| Quartile 2                                                        |             | 1.35<br>[0.89,2.03]    | 1.33<br>[0.88,2.02]   | 1.34<br>[0.89,2.03]    | 1.33<br>[0.88,2.01]   | 1.32<br>[0.87,2.00]   |
| Quartile 3                                                        |             | 1.64*<br>[1.11,2.44]   | 1.60*<br>[1.08,2.38]  | 1.63*<br>[1.10,2.42]   | 1.58*<br>[1.07,2.34]  | 1.54*<br>[1.04,2.29]  |
| Quartile 4 (least advantaged)                                     |             | 2.01***<br>[1.36,2.96] | 1.87**<br>[1.26,2.77] | 1.98***<br>[1.34,2.92] | 1.89**<br>[1.29,2.79] | 1.77**<br>[1.20,2.63] |
| <b>Education level:</b> College or University<br>degree           |             | 1.00<br>-              | 1.00<br>-             | 1.00<br>-              | 1.00<br>-             | 1.00<br>-             |
| A levels/AS levels or equivalent                                  |             | 1.10<br>[0.72,1.69]    | 1.05<br>[0.68,1.60]   | 1.09<br>[0.71,1.68]    | 1.05<br>[0.69,1.61]   | 1.00<br>[0.66,1.54]   |
| O levels/GCSEs/CSEs or equivalent                                 |             | 1.67***<br>[1.24,2.25] | 1.51**<br>[1.12,2.04] | 1.67***<br>[1.24,2.24] | 1.56**<br>[1.16,2.10] | 1.42*<br>[1.05,1.93]  |
| Other                                                             |             | 1.29<br>[0.85,1.94]    | 1.13<br>[0.74,1.72]   | 1.28<br>[0.85,1.92]    | 1.20<br>[0.80,1.81]   | 1.07<br>[0.70,1.62]   |
| None of the above                                                 |             | 2.22**<br>[1.31,3.74]  | 1.88*<br>[1.10,3.23]  | 2.19**<br>[1.30,3.70]  | 2.03**<br>[1.20,3.46] | 1.74*<br>[1.01,3.01]  |
| <b>Shiftwork:</b> No                                              |             |                        | 1.00<br>-             |                        |                       | 1.00<br>-             |
| Yes                                                               |             |                        | 1.43*<br>[1.06,1.92]  |                        |                       | 1.38*<br>[1.02,1.86]  |
| <b>Occupation:</b> Non-manual                                     |             |                        | 1.00<br>-             |                        |                       | 1.00<br>-             |
| Manual                                                            |             |                        | 1.39*<br>[1.02,1.89]  |                        |                       | 1.41*<br>[1.04,1.91]  |
| <b>Job tenure (years):</b> <=10                                   |             |                        | 1.00<br>-             |                        |                       | 1.00<br>-             |
| 11-20                                                             |             |                        | 1.21<br>[0.91,1.59]   |                        |                       | 1.22<br>[0.93,1.61]   |
| >20                                                               |             |                        | 0.71<br>[0.48,1.05]   |                        |                       | 0.72<br>[0.49,1.06]   |
| <b>Working hours/week:</b> <40                                    |             |                        | 1.00<br>-             |                        |                       | 1.00<br>-             |
| 40-45                                                             |             |                        | 0.98                  |                        |                       | 0.97                  |



|                                                         |  |  |                     |                     |                        |                       |
|---------------------------------------------------------|--|--|---------------------|---------------------|------------------------|-----------------------|
|                                                         |  |  | [0.73,1.32]         |                     |                        | [0.72,1.30]           |
| >45                                                     |  |  | 1.10<br>[0.77,1.56] |                     |                        | 1.08<br>[0.76,1.54]   |
| <b>Number of chronic conditions: 0</b>                  |  |  |                     | 1.00                |                        | 1.00                  |
|                                                         |  |  |                     | -                   |                        | -                     |
| 1                                                       |  |  |                     | 1.27<br>[0.97,1.66] |                        | 1.23<br>[0.93,1.61]   |
| 2                                                       |  |  |                     | 0.98<br>[0.64,1.50] |                        | 0.92<br>[0.60,1.41]   |
| 3                                                       |  |  |                     | 1.03<br>[0.52,2.04] |                        | 0.93<br>[0.46,1.86]   |
| 4+                                                      |  |  |                     | 1.48<br>[0.64,3.43] |                        | 1.31<br>[0.56,3.05]   |
| <b>Long-standing illness/disability: No</b>             |  |  |                     | 1.00                |                        | 1.00                  |
|                                                         |  |  |                     | -                   |                        | -                     |
| Yes                                                     |  |  |                     | 1.08<br>[0.79,1.47] |                        | 1.06<br>[0.77,1.45]   |
| <b>Body Mass Index category: Underweight (&lt;18.5)</b> |  |  |                     |                     | 1.15<br>[0.17,8.00]    | 1.15<br>[0.17,7.87]   |
| Normal weight (18.5-24.9)                               |  |  |                     |                     | 1.00                   | 1.00                  |
|                                                         |  |  |                     |                     | -                      | -                     |
| Overweight (25.0-29.9)                                  |  |  |                     |                     | 1.46*<br>[1.08,1.95]   | 1.44*<br>[1.07,1.94]  |
| Obese (>=30.0)                                          |  |  |                     |                     | 1.75***<br>[1.28,2.41] | 1.72**<br>[1.24,2.38] |
| <b>Smoking status: Never</b>                            |  |  |                     |                     | 1.00                   | 1.00                  |
|                                                         |  |  |                     |                     | -                      | -                     |
| Previous                                                |  |  |                     |                     | 1.32*<br>[1.00,1.74]   | 1.31<br>[0.99,1.73]   |
| Current                                                 |  |  |                     |                     | 1.00<br>[0.66,1.51]    | 0.96<br>[0.64,1.45]   |
| <b>Alcohol consumption: Daily or almost daily</b>       |  |  |                     |                     | 1.00                   | 1.00                  |
|                                                         |  |  |                     |                     | -                      | -                     |
| Three or four times a week                              |  |  |                     |                     | 0.88<br>[0.57,1.35]    | 0.88<br>[0.57,1.35]   |
| Once or twice a week                                    |  |  |                     |                     | 0.97                   | 0.96                  |

|                            |        |        |        |        |                     |                     |
|----------------------------|--------|--------|--------|--------|---------------------|---------------------|
|                            |        |        |        |        | [0.65,1.46]         | [0.64,1.44]         |
| One to three times a month |        |        |        |        | 1.40<br>[0.91,2.17] | 1.38<br>[0.89,2.14] |
| Special occasions only     |        |        |        |        | 1.07<br>[0.65,1.77] | 1.03<br>[0.62,1.71] |
| Never (former drinker)     |        |        |        |        | 0.48<br>[0.17,1.38] | 0.46<br>[0.16,1.32] |
| Never                      |        |        |        |        | 1.07<br>[0.58,1.99] | 1.02<br>[0.55,1.88] |
| <b>Observations</b>        | 120075 | 120075 | 120075 | 120075 | 120075              | 120075              |

CI=confidence interval; RR=risk ratio; \*  $p < 0.05$ , \*\*  $p < 0.01$ , \*\*\*  $p < 0.001$

Model 1: Adjusted for age group, sex, ethnicity, country of birth; Model 2: Model 1 + socioeconomic deprivation quartile, education level; Model 3: Model 2 + shift work, manual work, job tenure, working hours; Model 4: Model 2 + number of chronic conditions, long-standing illness/disability; Model 5: Model 2 + BMI category, smoking status, alcohol consumption; Model 6: All covariates

Table S7: Risk of severe COVID-19 according to narrow essential worker groups

|                                          | <b>Model 1</b>          | <b>Model 2</b>          | <b>Model 3</b>          | <b>Model 4</b>          | <b>Model 5</b>          | <b>Model 6</b>          |
|------------------------------------------|-------------------------|-------------------------|-------------------------|-------------------------|-------------------------|-------------------------|
| <b>Severe COVID-19</b>                   | <b>RR</b>               | <b>RR</b>               | <b>RR</b>               | <b>RR</b>               | <b>RR</b>               | <b>RR</b>               |
|                                          | <b>[95% CI]</b>         |
| <b>Occupation: Non-essential workers</b> | 1.00                    | 1.00                    | 1.00                    | 1.00                    | 1.00                    | 1.00                    |
|                                          | -                       | -                       | -                       | -                       | -                       | -                       |
| Healthcare professionals                 | 6.19***<br>[3.68,10.43] | 8.62***<br>[4.98,14.94] | 8.26***<br>[4.77,14.28] | 8.70***<br>[5.02,15.06] | 9.33***<br>[5.40,16.14] | 8.99***<br>[5.20,15.54] |
| Medical support staff                    | 8.70***<br>[4.87,15.55] | 7.43***<br>[4.17,13.25] | 6.48***<br>[3.62,11.58] | 7.39***<br>[4.13,13.19] | 7.33***<br>[4.13,13.02] | 6.42***<br>[3.60,11.45] |
| Health associate professionals           | 7.53***<br>[5.44,10.43] | 8.54***<br>[6.13,11.90] | 7.61***<br>[5.33,10.87] | 8.52***<br>[6.11,11.88] | 8.54***<br>[6.12,11.92] | 7.65***<br>[5.34,10.95] |
| Social care workers                      | 2.46***<br>[1.47,4.14]  | 2.38**<br>[1.42,4.00]   | 2.19**<br>[1.29,3.72]   | 2.36**<br>[1.40,3.97]   | 2.31**<br>[1.37,3.88]   | 2.13**<br>[1.25,3.63]   |
| Education workers                        | 1.36<br>[0.75,2.48]     | 1.61<br>[0.88,2.96]     | 1.59<br>[0.86,2.92]     | 1.61<br>[0.88,2.95]     | 1.62<br>[0.88,2.96]     | 1.59<br>[0.87,2.91]     |
| Food workers                             | 1.12<br>[0.52,2.42]     | 0.93<br>[0.43,1.98]     | 0.85<br>[0.40,1.83]     | 0.93<br>[0.43,1.98]     | 0.92<br>[0.43,1.96]     | 0.84<br>[0.39,1.80]     |
| Transport workers                        | 2.20**<br>[1.21,4.00]   | 1.66<br>[0.91,3.01]     | 1.48<br>[0.81,2.70]     | 1.66<br>[0.91,3.01]     | 1.58<br>[0.87,2.90]     | 1.43<br>[0.78,2.63]     |
| Police and protective service workers    | 1.55<br>[0.72,3.32]     | 1.36<br>[0.63,2.93]     | 1.21<br>[0.56,2.64]     | 1.35<br>[0.62,2.92]     | 1.32<br>[0.61,2.86]     | 1.19<br>[0.55,2.58]     |
| <b>Age group (current): Under 55</b>     | 1.00                    | 1.00                    | 1.00                    | 1.00                    | 1.00                    | 1.00                    |
|                                          | -                       | -                       | -                       | -                       | -                       | -                       |
| 55-59                                    | 1.06<br>[0.78,1.43]     | 1.05<br>[0.78,1.42]     | 1.08<br>[0.80,1.46]     | 1.05<br>[0.77,1.41]     | 1.05<br>[0.78,1.42]     | 1.08<br>[0.80,1.45]     |
| 60+                                      | 0.64**<br>[0.46,0.89]   | 0.63**<br>[0.46,0.88]   | 0.67*<br>[0.48,0.94]    | 0.62**<br>[0.45,0.87]   | 0.62**<br>[0.45,0.86]   | 0.65*<br>[0.47,0.91]    |
| <b>Sex: Female</b>                       | 1.00                    | 1.00                    | 1.00                    | 1.00                    | 1.00                    | 1.00                    |
|                                          | -                       | -                       | -                       | -                       | -                       | -                       |
| Male                                     | 1.35*<br>[1.03,1.78]    | 1.37*<br>[1.04,1.80]    | 1.31<br>[0.99,1.75]     | 1.37*<br>[1.04,1.80]    | 1.32*<br>[1.00,1.74]    | 1.28<br>[0.95,1.71]     |
| <b>Assessment centre: Manchester</b>     | 0.73<br>[0.39,1.37]     | 0.74<br>[0.39,1.40]     | 0.75<br>[0.40,1.41]     | 0.74<br>[0.39,1.40]     | 0.75<br>[0.39,1.42]     | 0.77<br>[0.40,1.46]     |
| Oxford                                   | 0.71                    | 0.78                    | 0.78                    | 0.79                    | 0.81                    | 0.82                    |

|                                 |                        |                        |                        |                        |                        |                        |
|---------------------------------|------------------------|------------------------|------------------------|------------------------|------------------------|------------------------|
|                                 | [0.35,1.42]            | [0.39,1.57]            | [0.39,1.56]            | [0.39,1.58]            | [0.40,1.63]            | [0.41,1.64]            |
| Stoke                           | 0.63<br>[0.33,1.19]    | 0.67<br>[0.35,1.26]    | 0.66<br>[0.35,1.24]    | 0.67<br>[0.35,1.26]    | 0.66<br>[0.35,1.25]    | 0.65<br>[0.35,1.24]    |
| Reading                         | 0.41**<br>[0.22,0.77]  | 0.51*<br>[0.27,0.96]   | 0.51*<br>[0.27,0.96]   | 0.51*<br>[0.27,0.97]   | 0.51*<br>[0.27,0.97]   | 0.52*<br>[0.27,0.98]   |
| Bury                            | 0.49*<br>[0.26,0.89]   | 0.50*<br>[0.27,0.93]   | 0.51*<br>[0.28,0.93]   | 0.51*<br>[0.28,0.93]   | 0.50*<br>[0.27,0.93]   | 0.51*<br>[0.28,0.94]   |
| Newcastle                       | 1.00<br>-              | 1.00<br>-              | 1.00<br>-              | 1.00<br>-              | 1.00<br>-              | 1.00<br>-              |
| Leeds                           | 0.38***<br>[0.22,0.65] | 0.41***<br>[0.24,0.69] | 0.41**<br>[0.24,0.70]  | 0.41**<br>[0.24,0.70]  | 0.41***<br>[0.24,0.69] | 0.41**<br>[0.24,0.70]  |
| Bristol                         | 0.24***<br>[0.13,0.45] | 0.27***<br>[0.14,0.50] | 0.27***<br>[0.14,0.50] | 0.27***<br>[0.14,0.50] | 0.27***<br>[0.14,0.51] | 0.27***<br>[0.14,0.51] |
| Barts                           | 0.20**<br>[0.07,0.55]  | 0.18**<br>[0.06,0.50]  | 0.19**<br>[0.07,0.53]  | 0.18**<br>[0.06,0.51]  | 0.19**<br>[0.07,0.53]  | 0.19**<br>[0.07,0.55]  |
| Nottingham                      | 0.30***<br>[0.15,0.58] | 0.32***<br>[0.17,0.63] | 0.33***<br>[0.17,0.63] | 0.33***<br>[0.17,0.63] | 0.33**<br>[0.17,0.64]  | 0.33**<br>[0.17,0.64]  |
| Sheffield                       | 0.80<br>[0.50,1.28]    | 0.83<br>[0.52,1.32]    | 0.84<br>[0.53,1.34]    | 0.83<br>[0.52,1.32]    | 0.84<br>[0.52,1.34]    | 0.85<br>[0.53,1.37]    |
| Liverpool                       | 0.86<br>[0.54,1.37]    | 0.87<br>[0.55,1.39]    | 0.88<br>[0.55,1.41]    | 0.87<br>[0.55,1.39]    | 0.86<br>[0.54,1.37]    | 0.88<br>[0.55,1.40]    |
| Middlesborough                  | 0.45*<br>[0.23,0.87]   | 0.47*<br>[0.24,0.92]   | 0.48*<br>[0.25,0.93]   | 0.47*<br>[0.24,0.92]   | 0.46*<br>[0.24,0.90]   | 0.47*<br>[0.24,0.93]   |
| Hounslow                        | 0.37**<br>[0.20,0.67]  | 0.37**<br>[0.20,0.67]  | 0.38**<br>[0.21,0.69]  | 0.37**<br>[0.20,0.68]  | 0.38**<br>[0.20,0.69]  | 0.39**<br>[0.21,0.71]  |
| Croydon                         | 0.36***<br>[0.20,0.64] | 0.36***<br>[0.20,0.65] | 0.37**<br>[0.21,0.67]  | 0.36***<br>[0.20,0.66] | 0.36***<br>[0.20,0.65] | 0.38**<br>[0.21,0.68]  |
| Birmingham                      | 0.40**<br>[0.22,0.72]  | 0.39**<br>[0.21,0.70]  | 0.41**<br>[0.23,0.73]  | 0.39**<br>[0.22,0.71]  | 0.38**<br>[0.21,0.70]  | 0.40**<br>[0.22,0.73]  |
| <b>Ethnicity: White British</b> | 1.00<br>-              | 1.00<br>-              | 1.00<br>-              | 1.00<br>-              | 1.00<br>-              | 1.00<br>-              |
| White Irish                     | 1.54<br>[0.82,2.90]    | 1.56<br>[0.83,2.94]    | 1.57<br>[0.84,2.95]    | 1.56<br>[0.83,2.93]    | 1.57<br>[0.84,2.96]    | 1.58<br>[0.84,2.96]    |
| White Other                     | 1.21<br>[0.61,2.40]    | 1.25<br>[0.63,2.48]    | 1.26<br>[0.63,2.50]    | 1.25<br>[0.63,2.47]    | 1.22<br>[0.62,2.42]    | 1.23<br>[0.62,2.43]    |
| Mixed                           | 1.42                   | 1.37                   | 1.35                   | 1.37                   | 1.32                   | 1.31                   |

|                                                                   |                        |                        |                        |                        |                        |                        |
|-------------------------------------------------------------------|------------------------|------------------------|------------------------|------------------------|------------------------|------------------------|
|                                                                   | [0.45,4.46]            | [0.44,4.27]            | [0.43,4.23]            | [0.44,4.28]            | [0.42,4.11]            | [0.42,4.09]            |
| South Asian                                                       | 4.02***<br>[2.26,7.15] | 3.78***<br>[2.12,6.73] | 3.77***<br>[2.11,6.74] | 3.77***<br>[2.11,6.73] | 3.91***<br>[2.20,6.92] | 3.94***<br>[2.21,7.02] |
| Black                                                             | 3.42***<br>[2.04,5.74] | 2.95***<br>[1.76,4.95] | 2.89***<br>[1.72,4.87] | 2.94***<br>[1.76,4.93] | 2.74***<br>[1.62,4.61] | 2.70***<br>[1.59,4.57] |
| Other                                                             | 1.47<br>[0.60,3.62]    | 1.38<br>[0.55,3.42]    | 1.31<br>[0.53,3.27]    | 1.38<br>[0.55,3.43]    | 1.40<br>[0.57,3.46]    | 1.36<br>[0.55,3.35]    |
| <b>Country of birth:</b> UK & Ireland                             | 1.00<br>-              | 1.00<br>-              | 1.00<br>-              | 1.00<br>-              | 1.00<br>-              | 1.00<br>-              |
| Elsewhere                                                         | 0.90<br>[0.59,1.37]    | 0.91<br>[0.59,1.39]    | 0.85<br>[0.55,1.32]    | 0.92<br>[0.60,1.41]    | 0.91<br>[0.59,1.40]    | 0.87<br>[0.56,1.36]    |
| <b>Socioeconomic deprivation:</b> Quartile 1<br>(most advantaged) |                        | 1.00<br>-              | 1.00<br>-              | 1.00<br>-              | 1.00<br>-              | 1.00<br>-              |
| Quartile 2                                                        |                        | 1.35<br>[0.89,2.03]    | 1.34<br>[0.88,2.02]    | 1.34<br>[0.89,2.03]    | 1.33<br>[0.88,2.02]    | 1.32<br>[0.88,2.00]    |
| Quartile 3                                                        |                        | 1.64*<br>[1.11,2.43]   | 1.60*<br>[1.08,2.38]   | 1.63*<br>[1.10,2.41]   | 1.58*<br>[1.07,2.34]   | 1.54*<br>[1.04,2.29]   |
| Quartile 4 (least advantaged)                                     |                        | 1.99***<br>[1.35,2.93] | 1.87**<br>[1.26,2.76]  | 1.97***<br>[1.33,2.90] | 1.89**<br>[1.28,2.78]  | 1.78**<br>[1.20,2.63]  |
| <b>Education level:</b> College or University<br>degree           |                        | 1.00<br>-              | 1.00<br>-              | 1.00<br>-              | 1.00<br>-              | 1.00<br>-              |
| A levels/AS levels or equivalent                                  |                        | 1.09<br>[0.71,1.68]    | 1.05<br>[0.69,1.62]    | 1.09<br>[0.71,1.68]    | 1.06<br>[0.69,1.63]    | 1.02<br>[0.67,1.57]    |
| O levels/GCSEs/CSEs or equivalent                                 |                        | 1.67***<br>[1.23,2.27] | 1.53**<br>[1.12,2.09]  | 1.67**<br>[1.23,2.27]  | 1.58**<br>[1.17,2.15]  | 1.45*<br>[1.06,1.99]   |
| Other                                                             |                        | 1.27<br>[0.83,1.93]    | 1.13<br>[0.74,1.74]    | 1.26<br>[0.83,1.92]    | 1.20<br>[0.79,1.83]    | 1.08<br>[0.70,1.65]    |
| None of the above                                                 |                        | 2.20**<br>[1.28,3.78]  | 1.89*<br>[1.09,3.29]   | 2.18**<br>[1.27,3.74]  | 2.05*<br>[1.19,3.53]   | 1.76*<br>[1.01,3.09]   |
| <b>Shiftwork:</b> No                                              |                        |                        | 1.00<br>-              |                        |                        | 1.00<br>-              |
| Yes                                                               |                        |                        | 1.41*<br>[1.04,1.91]   |                        |                        | 1.37*<br>[1.01,1.86]   |
| <b>Occupation:</b> Non-manual                                     |                        |                        | 1.00<br>-              |                        |                        | 1.00<br>-              |
| Manual                                                            |                        |                        | 1.41*                  |                        |                        | 1.42*                  |

|                                                         |  |  |             |             |             |             |
|---------------------------------------------------------|--|--|-------------|-------------|-------------|-------------|
|                                                         |  |  | [1.03,1.91] |             |             | [1.05,1.93] |
| <b>Job tenure (years): &lt;=10</b>                      |  |  | 1.00        |             |             | 1.00        |
|                                                         |  |  | -           |             |             | -           |
| 11-20                                                   |  |  | 1.21        |             |             | 1.22        |
|                                                         |  |  | [0.91,1.59] |             |             | [0.93,1.61] |
| >20                                                     |  |  | 0.71        |             |             | 0.72        |
|                                                         |  |  | [0.48,1.05] |             |             | [0.49,1.06] |
| <b>Working hours/week: &lt;40</b>                       |  |  | 1.00        |             |             | 1.00        |
|                                                         |  |  | -           |             |             | -           |
| 40-45                                                   |  |  | 0.98        |             |             | 0.96        |
|                                                         |  |  | [0.73,1.31] |             |             | [0.72,1.29] |
| >45                                                     |  |  | 1.08        |             |             | 1.05        |
|                                                         |  |  | [0.75,1.54] |             |             | [0.74,1.51] |
| <b>Number of chronic conditions: 0</b>                  |  |  |             | 1.00        |             | 1.00        |
|                                                         |  |  |             | -           |             | -           |
| 1                                                       |  |  |             | 1.27        |             | 1.23        |
|                                                         |  |  |             | [0.97,1.66] |             | [0.94,1.61] |
| 2                                                       |  |  |             | 0.98        |             | 0.92        |
|                                                         |  |  |             | [0.64,1.49] |             | [0.60,1.41] |
| 3                                                       |  |  |             | 1.03        |             | 0.92        |
|                                                         |  |  |             | [0.52,2.03] |             | [0.46,1.85] |
| 4+                                                      |  |  |             | 1.48        |             | 1.31        |
|                                                         |  |  |             | [0.64,3.43] |             | [0.56,3.06] |
| <b>Long-standing illness/disability: No</b>             |  |  |             | 1.00        |             | 1.00        |
|                                                         |  |  |             | -           |             | -           |
| Yes                                                     |  |  |             | 1.08        |             | 1.06        |
|                                                         |  |  |             | [0.78,1.47] |             | [0.77,1.45] |
| <b>Body Mass Index category: Underweight (&lt;18.5)</b> |  |  |             |             | 1.15        | 1.15        |
|                                                         |  |  |             |             | [0.17,8.02] | [0.17,7.88] |
| Normal weight (18.5-24.9)                               |  |  |             |             | 1.00        | 1.00        |
|                                                         |  |  |             |             | -           | -           |
| Overweight (25.0-29.9)                                  |  |  |             |             | 1.46*       | 1.45*       |
|                                                         |  |  |             |             | [1.09,1.96] | [1.07,1.95] |
| Obese (>=30.0)                                          |  |  |             |             | 1.75***     | 1.72**      |
|                                                         |  |  |             |             | [1.27,2.40] | [1.24,2.39] |
| <b>Smoking status: Never</b>                            |  |  |             |             | 1.00        | 1.00        |

|                                                   |        |        |        |        |                     |                     |
|---------------------------------------------------|--------|--------|--------|--------|---------------------|---------------------|
|                                                   |        |        |        |        | -                   | -                   |
| Previous                                          |        |        |        |        | 1.31<br>[1.00,1.74] | 1.31<br>[0.99,1.73] |
| Current                                           |        |        |        |        | 1.00<br>[0.66,1.51] | 0.96<br>[0.64,1.45] |
| <b>Alcohol consumption:</b> Daily or almost daily |        |        |        |        | 1.00<br>-           | 1.00<br>-           |
| Three or four times a week                        |        |        |        |        | 0.88<br>[0.57,1.35] | 0.88<br>[0.57,1.35] |
| Once or twice a week                              |        |        |        |        | 0.97<br>[0.65,1.46] | 0.96<br>[0.64,1.44] |
| One to three times a month                        |        |        |        |        | 1.40<br>[0.90,2.17] | 1.38<br>[0.89,2.14] |
| Special occasions only                            |        |        |        |        | 1.08<br>[0.65,1.78] | 1.04<br>[0.63,1.72] |
| Never (former drinker)                            |        |        |        |        | 0.48<br>[0.17,1.38] | 0.46<br>[0.16,1.32] |
| Never                                             |        |        |        |        | 1.08<br>[0.58,2.00] | 1.03<br>[0.55,1.90] |
| <b>Observations</b>                               | 120075 | 120075 | 120075 | 120075 | 120075              | 120075              |

CI=confidence interval; RR=risk ratio; \*  $p < 0.05$ , \*\*  $p < 0.01$ , \*\*\*  $p < 0.001$

Model 1: Adjusted for age group, sex, ethnicity, country of birth; Model 2: Model 1 + socioeconomic deprivation quartile, education level; Model 3: Model 2 + shift work, manual work, job tenure, working hours; Model 4: Model 2 + number of chronic conditions, long-standing illness/disability; Model 5: Model 2 + BMI category, smoking status, alcohol consumption; Model 6: All covariates

Table S8: Risk of severe COVID-19 according to SOC2000 major occupational groups

|                                                  | <b>Model 1</b>  | <b>Model 2</b>  | <b>Model 3</b>  | <b>Model 4</b>  | <b>Model 5</b>  | <b>Model 6</b>  |
|--------------------------------------------------|-----------------|-----------------|-----------------|-----------------|-----------------|-----------------|
| <b>Severe COVID-19</b>                           | <b>RR</b>       | <b>RR</b>       | <b>RR</b>       | <b>RR</b>       | <b>RR</b>       | <b>RR</b>       |
|                                                  | <b>[95% CI]</b> |
| <b>Occupation: Managers and Senior Officials</b> | 1.00            | 1.00            | 1.00            | 1.00            | 1.00            | 1.00            |
|                                                  | -               | -               | -               | -               | -               | -               |
| Professional Occupations                         | 1.36            | 1.47            | 1.49            | 1.47            | 1.51            | 1.53            |
|                                                  | [0.85,2.18]     | [0.91,2.36]     | [0.92,2.41]     | [0.91,2.36]     | [0.94,2.43]     | [0.95,2.48]     |
| Associate Professional and Technical Occupations | 3.19***         | 3.11***         | 2.73***         | 3.10***         | 3.15***         | 2.78***         |
|                                                  | [2.10,4.85]     | [2.05,4.72]     | [1.77,4.23]     | [2.04,4.71]     | [2.08,4.79]     | [1.79,4.29]     |
| Administrative and Secretarial Occupations       | 1.24            | 1.14            | 1.22            | 1.14            | 1.17            | 1.24            |
|                                                  | [0.73,2.12]     | [0.67,1.95]     | [0.71,2.11]     | [0.67,1.94]     | [0.68,2.00]     | [0.72,2.15]     |
| Skilled Trades Occupations                       | 0.82            | 0.67            | 0.49            | 0.68            | 0.69            | 0.50            |
|                                                  | [0.39,1.74]     | [0.31,1.44]     | [0.22,1.06]     | [0.32,1.45]     | [0.32,1.49]     | [0.23,1.09]     |
| Personal Service Occupations                     | 2.73***         | 2.31**          | 1.75            | 2.29**          | 2.33**          | 1.77            |
|                                                  | [1.56,4.76]     | [1.32,4.03]     | [0.99,3.10]     | [1.32,4.00]     | [1.34,4.06]     | [1.00,3.13]     |
| Sales and Customer Service Occupations           | 1.36            | 1.09            | 0.91            | 1.08            | 1.08            | 0.90            |
|                                                  | [0.59,3.17]     | [0.46,2.57]     | [0.38,2.18]     | [0.46,2.55]     | [0.46,2.56]     | [0.38,2.16]     |
| Process, Plant and Machine Operatives            | 2.39**          | 1.82            | 1.25            | 1.81            | 1.81            | 1.26            |
|                                                  | [1.31,4.36]     | [0.99,3.34]     | [0.66,2.36]     | [0.99,3.33]     | [0.99,3.34]     | [0.67,2.37]     |
| Elementary Occupations                           | 1.76            | 1.29            | 0.87            | 1.28            | 1.31            | 0.89            |
|                                                  | [0.92,3.34]     | [0.65,2.53]     | [0.43,1.75]     | [0.65,2.52]     | [0.67,2.59]     | [0.44,1.79]     |
| <b>Age group (current): Under 55</b>             | 1.00            | 1.00            | 1.00            | 1.00            | 1.00            | 1.00            |
|                                                  | -               | -               | -               | -               | -               | -               |
| 55-59                                            | 1.08            | 1.08            | 1.11            | 1.07            | 1.08            | 1.11            |
|                                                  | [0.80,1.46]     | [0.80,1.46]     | [0.82,1.51]     | [0.79,1.45]     | [0.80,1.46]     | [0.82,1.50]     |
| 60+                                              | 0.66*           | 0.66*           | 0.70*           | 0.65*           | 0.65*           | 0.68*           |
|                                                  | [0.48,0.92]     | [0.47,0.92]     | [0.50,0.98]     | [0.47,0.90]     | [0.47,0.90]     | [0.49,0.95]     |
| <b>Sex: Female</b>                               | 1.00            | 1.00            | 1.00            | 1.00            | 1.00            | 1.00            |
|                                                  | -               | -               | -               | -               | -               | -               |
| Male                                             | 1.02            | 1.02            | 1.00            | 1.02            | 0.98            | 0.97            |
|                                                  | [0.78,1.33]     | [0.78,1.32]     | [0.76,1.32]     | [0.78,1.33]     | [0.75,1.29]     | [0.74,1.29]     |
| <b>Assessment centre: Manchester</b>             | 0.69            | 0.68            | 0.70            | 0.68            | 0.69            | 0.72            |
|                                                  | [0.36,1.30]     | [0.36,1.29]     | [0.37,1.34]     | [0.36,1.30]     | [0.36,1.32]     | [0.38,1.37]     |
| Oxford                                           | 0.66            | 0.71            | 0.73            | 0.71            | 0.74            | 0.76            |



|                                 |                        |                        |                        |                        |                        |                        |
|---------------------------------|------------------------|------------------------|------------------------|------------------------|------------------------|------------------------|
|                                 | [0.33,1.32]            | [0.36,1.43]            | [0.37,1.46]            | [0.36,1.43]            | [0.37,1.48]            | [0.38,1.53]            |
| Stoke                           | 0.59<br>[0.31,1.12]    | 0.63<br>[0.33,1.19]    | 0.63<br>[0.33,1.19]    | 0.63<br>[0.34,1.20]    | 0.63<br>[0.33,1.19]    | 0.63<br>[0.34,1.19]    |
| Reading                         | 0.37**<br>[0.20,0.69]  | 0.43**<br>[0.23,0.81]  | 0.44*<br>[0.23,0.84]   | 0.43**<br>[0.23,0.82]  | 0.44*<br>[0.23,0.82]   | 0.45*<br>[0.24,0.86]   |
| Bury                            | 0.46*<br>[0.25,0.85]   | 0.48*<br>[0.26,0.88]   | 0.49*<br>[0.27,0.90]   | 0.48*<br>[0.26,0.88]   | 0.48*<br>[0.26,0.88]   | 0.49*<br>[0.27,0.91]   |
| Newcastle                       | 1.00<br>-              | 1.00<br>-              | 1.00<br>-              | 1.00<br>-              | 1.00<br>-              | 1.00<br>-              |
| Leeds                           | 0.36***<br>[0.21,0.61] | 0.37***<br>[0.22,0.63] | 0.38***<br>[0.22,0.65] | 0.37***<br>[0.22,0.64] | 0.37***<br>[0.22,0.64] | 0.39***<br>[0.23,0.66] |
| Bristol                         | 0.23***<br>[0.12,0.42] | 0.25***<br>[0.13,0.47] | 0.26**<br>[0.14,0.48]  | 0.25***<br>[0.13,0.47] | 0.25***<br>[0.13,0.47] | 0.26***<br>[0.14,0.49] |
| Barts                           | 0.16***<br>[0.06,0.46] | 0.14***<br>[0.05,0.40] | 0.15***<br>[0.05,0.44] | 0.14***<br>[0.05,0.41] | 0.15***<br>[0.05,0.42] | 0.16***<br>[0.06,0.46] |
| Nottingham                      | 0.29***<br>[0.15,0.56] | 0.30***<br>[0.16,0.59] | 0.31***<br>[0.16,0.61] | 0.30***<br>[0.16,0.59] | 0.31***<br>[0.16,0.60] | 0.32***<br>[0.16,0.61] |
| Sheffield                       | 0.81<br>[0.50,1.29]    | 0.83<br>[0.52,1.33]    | 0.85<br>[0.53,1.37]    | 0.83<br>[0.52,1.33]    | 0.84<br>[0.52,1.34]    | 0.86<br>[0.54,1.38]    |
| Liverpool                       | 0.85<br>[0.53,1.36]    | 0.85<br>[0.53,1.36]    | 0.87<br>[0.55,1.39]    | 0.85<br>[0.53,1.36]    | 0.84<br>[0.52,1.34]    | 0.86<br>[0.54,1.37]    |
| Middlesborough                  | 0.45*<br>[0.23,0.88]   | 0.47*<br>[0.24,0.92]   | 0.48*<br>[0.25,0.93]   | 0.47*<br>[0.24,0.92]   | 0.46*<br>[0.24,0.91]   | 0.47*<br>[0.24,0.93]   |
| Hounslow                        | 0.30***<br>[0.16,0.55] | 0.29***<br>[0.16,0.53] | 0.30***<br>[0.17,0.56] | 0.29***<br>[0.16,0.54] | 0.30***<br>[0.16,0.55] | 0.31***<br>[0.17,0.58] |
| Croydon                         | 0.31***<br>[0.17,0.56] | 0.30***<br>[0.17,0.54] | 0.32***<br>[0.18,0.58] | 0.30***<br>[0.17,0.55] | 0.30***<br>[0.17,0.55] | 0.33***<br>[0.18,0.59] |
| Birmingham                      | 0.37**<br>[0.20,0.67]  | 0.36***<br>[0.20,0.65] | 0.38**<br>[0.21,0.69]  | 0.36***<br>[0.20,0.65] | 0.36***<br>[0.20,0.65] | 0.38**<br>[0.21,0.69]  |
| <b>Ethnicity: White British</b> | 1.00<br>-              | 1.00<br>-              | 1.00<br>-              | 1.00<br>-              | 1.00<br>-              | 1.00<br>-              |
| White Irish                     | 1.80<br>[0.96,3.39]    | 1.78<br>[0.95,3.35]    | 1.76<br>[0.94,3.30]    | 1.78<br>[0.95,3.34]    | 1.78<br>[0.95,3.36]    | 1.75<br>[0.93,3.29]    |
| White Other                     | 1.16<br>[0.58,2.31]    | 1.14<br>[0.57,2.29]    | 1.17<br>[0.58,2.35]    | 1.14<br>[0.57,2.28]    | 1.12<br>[0.56,2.25]    | 1.14<br>[0.57,2.29]    |
| Mixed                           | 1.36                   | 1.28                   | 1.26                   | 1.28                   | 1.24                   | 1.23                   |

|                                                                |                        |                        |                        |                        |                        |                        |
|----------------------------------------------------------------|------------------------|------------------------|------------------------|------------------------|------------------------|------------------------|
|                                                                | [0.43,4.25]            | [0.41,4.00]            | [0.40,3.94]            | [0.41,4.00]            | [0.40,3.88]            | [0.39,3.86]            |
| South Asian                                                    | 4.41***<br>[2.47,7.89] | 4.12***<br>[2.31,7.37] | 4.10***<br>[2.29,7.35] | 4.08***<br>[2.28,7.31] | 4.14***<br>[2.32,7.37] | 4.19***<br>[2.34,7.51] |
| Black                                                          | 3.95***<br>[2.40,6.52] | 3.39***<br>[2.05,5.59] | 3.22***<br>[1.94,5.37] | 3.37***<br>[2.04,5.55] | 3.12***<br>[1.88,5.20] | 3.01***<br>[1.80,5.05] |
| Other                                                          | 1.57<br>[0.64,3.85]    | 1.48<br>[0.60,3.66]    | 1.38<br>[0.56,3.43]    | 1.47<br>[0.60,3.64]    | 1.50<br>[0.61,3.68]    | 1.42<br>[0.58,3.50]    |
| <b>Country of birth:</b> UK & Ireland                          | 1.00<br>-              | 1.00<br>-              | 1.00<br>-              | 1.00<br>-              | 1.00<br>-              | 1.00<br>-              |
| Elsewhere                                                      | 1.01<br>[0.66,1.53]    | 1.01<br>[0.66,1.55]    | 0.92<br>[0.59,1.43]    | 1.02<br>[0.67,1.56]    | 1.01<br>[0.66,1.55]    | 0.94<br>[0.60,1.46]    |
| <b>Socioeconomic deprivation:</b> Quartile 1 (most advantaged) |                        | 1.00<br>-              | 1.00<br>-              | 1.00<br>-              | 1.00<br>-              | 1.00<br>-              |
| Quartile 2                                                     |                        | 1.34<br>[0.88,2.02]    | 1.32<br>[0.87,2.00]    | 1.33<br>[0.88,2.02]    | 1.32<br>[0.87,1.99]    | 1.31<br>[0.86,1.98]    |
| Quartile 3                                                     |                        | 1.61*<br>[1.09,2.39]   | 1.57*<br>[1.06,2.34]   | 1.61*<br>[1.08,2.38]   | 1.56*<br>[1.06,2.31]   | 1.52*<br>[1.03,2.25]   |
| Quartile 4 (least advantaged)                                  |                        | 1.92**<br>[1.30,2.84]  | 1.81**<br>[1.22,2.68]  | 1.90**<br>[1.29,2.81]  | 1.83**<br>[1.23,2.70]  | 1.72**<br>[1.16,2.55]  |
| <b>Education level:</b> College or University degree           |                        | 1.00<br>-              | 1.00<br>-              | 1.00<br>-              | 1.00<br>-              | 1.00<br>-              |
| A levels/AS levels or equivalent                               |                        | 0.89<br>[0.58,1.36]    | 0.87<br>[0.56,1.33]    | 0.88<br>[0.57,1.36]    | 0.86<br>[0.56,1.32]    | 0.84<br>[0.55,1.29]    |
| O levels/GCSEs/CSEs or equivalent                              |                        | 1.33<br>[0.97,1.82]    | 1.22<br>[0.89,1.67]    | 1.32<br>[0.96,1.82]    | 1.25<br>[0.91,1.71]    | 1.15<br>[0.84,1.58]    |
| Other                                                          |                        | 1.32<br>[0.86,2.02]    | 1.15<br>[0.75,1.77]    | 1.31<br>[0.86,2.01]    | 1.25<br>[0.82,1.91]    | 1.09<br>[0.71,1.68]    |
| None of the above                                              |                        | 1.70<br>[0.97,2.98]    | 1.52<br>[0.87,2.67]    | 1.69<br>[0.96,2.96]    | 1.58<br>[0.90,2.79]    | 1.42<br>[0.81,2.50]    |
| <b>Shiftwork:</b> No                                           |                        |                        | 1.00<br>-              |                        |                        | 1.00<br>-              |
| Yes                                                            |                        |                        | 1.78***<br>[1.31,2.42] |                        |                        | 1.74***<br>[1.28,2.36] |
| <b>Occupation:</b> Non-manual                                  |                        |                        | 1.00<br>-              |                        |                        | 1.00<br>-              |
| Manual                                                         |                        |                        | 1.79***                |                        |                        | 1.82***                |

|                                                         |  |  |             |             |             |             |
|---------------------------------------------------------|--|--|-------------|-------------|-------------|-------------|
|                                                         |  |  | [1.29,2.50] |             |             | [1.31,2.53] |
| <b>Job tenure (years): &lt;=10</b>                      |  |  | 1.00        |             |             | 1.00        |
|                                                         |  |  | -           |             |             | -           |
| 11-20                                                   |  |  | 1.20        |             |             | 1.22        |
|                                                         |  |  | [0.91,1.58] |             |             | [0.92,1.61] |
| >20                                                     |  |  | 0.72        |             |             | 0.73        |
|                                                         |  |  | [0.49,1.07] |             |             | [0.49,1.08] |
| <b>Working hours/week: &lt;40</b>                       |  |  | 1.00        |             |             | 1.00        |
|                                                         |  |  | -           |             |             | -           |
| 40-45                                                   |  |  | 0.91        |             |             | 0.90        |
|                                                         |  |  | [0.68,1.23] |             |             | [0.67,1.22] |
| >45                                                     |  |  | 1.11        |             |             | 1.09        |
|                                                         |  |  | [0.77,1.58] |             |             | [0.76,1.56] |
| <b>Number of chronic conditions: 0</b>                  |  |  |             | 1.00        |             | 1.00        |
|                                                         |  |  |             | -           |             | -           |
| 1                                                       |  |  |             | 1.26        |             | 1.22        |
|                                                         |  |  |             | [0.96,1.65] |             | [0.93,1.60] |
| 2                                                       |  |  |             | 1.00        |             | 0.94        |
|                                                         |  |  |             | [0.66,1.52] |             | [0.61,1.44] |
| 3                                                       |  |  |             | 1.04        |             | 0.95        |
|                                                         |  |  |             | [0.53,2.07] |             | [0.47,1.91] |
| 4+                                                      |  |  |             | 1.51        |             | 1.34        |
|                                                         |  |  |             | [0.65,3.50] |             | [0.57,3.14] |
| <b>Long-standing illness/disability: No</b>             |  |  |             | 1.00        |             | 1.00        |
|                                                         |  |  |             | -           |             | -           |
| Yes                                                     |  |  |             | 1.07        |             | 1.05        |
|                                                         |  |  |             | [0.78,1.47] |             | [0.77,1.44] |
| <b>Body Mass Index category: Underweight (&lt;18.5)</b> |  |  |             |             | 1.06        | 1.08        |
|                                                         |  |  |             |             | [0.15,7.45] | [0.15,7.55] |
| Normal weight (18.5-24.9)                               |  |  |             |             | 1.00        | 1.00        |
|                                                         |  |  |             |             | -           | -           |
| Overweight (25.0-29.9)                                  |  |  |             |             | 1.44*       | 1.42*       |
|                                                         |  |  |             |             | [1.07,1.93] | [1.05,1.91] |
| Obese (>=30.0)                                          |  |  |             |             | 1.68**      | 1.65**      |
|                                                         |  |  |             |             | [1.23,2.31] | [1.19,2.29] |
| <b>Smoking status: Never</b>                            |  |  |             |             | 1.00        | 1.00        |

|                                                   |        |        |        |        |                     |                     |
|---------------------------------------------------|--------|--------|--------|--------|---------------------|---------------------|
|                                                   |        |        |        |        | -                   | -                   |
| Previous                                          |        |        |        |        | 1.29<br>[0.98,1.71] | 1.29<br>[0.97,1.70] |
| Current                                           |        |        |        |        | 0.96<br>[0.64,1.45] | 0.93<br>[0.62,1.40] |
| <b>Alcohol consumption:</b> Daily or almost daily |        |        |        |        | 1.00<br>-           | 1.00<br>-           |
| Three or four times a week                        |        |        |        |        | 0.90<br>[0.58,1.38] | 0.89<br>[0.58,1.36] |
| Once or twice a week                              |        |        |        |        | 0.97<br>[0.65,1.46] | 0.96<br>[0.64,1.45] |
| One to three times a month                        |        |        |        |        | 1.44<br>[0.92,2.23] | 1.39<br>[0.89,2.16] |
| Special occasions only                            |        |        |        |        | 1.09<br>[0.66,1.80] | 1.03<br>[0.62,1.70] |
| Never (former drinker)                            |        |        |        |        | 0.51<br>[0.18,1.46] | 0.49<br>[0.17,1.39] |
| Never                                             |        |        |        |        | 1.14<br>[0.61,2.11] | 1.06<br>[0.57,1.96] |
| <b>Observations</b>                               | 120075 | 120075 | 120075 | 120075 | 120075              | 120075              |

CI=confidence interval; RR=risk ratio; \*  $p < 0.05$ , \*\*  $p < 0.01$ , \*\*\*  $p < 0.001$

Model 1: Adjusted for age group, sex, ethnicity, country of birth; Model 2: Model 1 + socioeconomic deprivation quartile, education level; Model 3: Model 2 + shift work, manual work, job tenure, working hours; Model 4: Model 2 + number of chronic conditions, long-standing illness/disability; Model 5: Model 2 + BMI category, smoking status, alcohol consumption; Model 6: All covariates

Table S9: Risk of severe COVID-19 according to broad race/occupation groups

|                                      | <b>Model 1</b>          | <b>Model 2</b>          | <b>Model 3</b>          | <b>Model 4</b>          | <b>Model 5</b>          | <b>Model 6</b>          |
|--------------------------------------|-------------------------|-------------------------|-------------------------|-------------------------|-------------------------|-------------------------|
| <b>Severe COVID-19</b>               | <b>RR</b>               | <b>RR</b>               | <b>RR</b>               | <b>RR</b>               | <b>RR</b>               | <b>RR</b>               |
|                                      | <b>[95% CI]</b>         |
| <b>Race/occupation group:</b>        | 1.00                    | 1.00                    | 1.00                    | 1.00                    | 1.00                    | 1.00                    |
| White (non-essential worker)         | -                       | -                       | -                       | -                       | -                       | -                       |
| Non-white (non-essential worker)     | 3.27***<br>[1.90,5.62]  | 3.04***<br>[1.77,5.20]  | 2.98***<br>[1.73,5.13]  | 3.03***<br>[1.77,5.18]  | 2.98***<br>[1.73,5.11]  | 2.95***<br>[1.71,5.09]  |
| White (essential worker)             | 3.47***<br>[2.63,4.59]  | 3.40***<br>[2.58,4.48]  | 3.01***<br>[2.27,3.99]  | 3.39***<br>[2.58,4.46]  | 3.36***<br>[2.55,4.43]  | 2.99***<br>[2.25,3.96]  |
| Non-white (essential worker)         | 8.34***<br>[5.17,13.47] | 7.37***<br>[4.56,11.92] | 6.36***<br>[3.89,10.40] | 7.34***<br>[4.53,11.88] | 7.08***<br>[4.40,11.41] | 6.19***<br>[3.80,10.09] |
| <b>Age group (current):</b> Under 55 | 1.00                    | 1.00                    | 1.00                    | 1.00                    | 1.00                    | 1.00                    |
| 55-59                                | -                       | -                       | -                       | -                       | -                       | -                       |
| 60+                                  | 1.06<br>[0.78,1.43]     | 1.06<br>[0.78,1.43]     | 1.08<br>[0.80,1.47]     | 1.05<br>[0.78,1.42]     | 1.06<br>[0.78,1.43]     | 1.08<br>[0.80,1.46]     |
| <b>Sex:</b> Female                   | 0.63**<br>[0.45,0.87]   | 0.63**<br>[0.45,0.88]   | 0.67*<br>[0.48,0.93]    | 0.62**<br>[0.45,0.87]   | 0.62**<br>[0.45,0.87]   | 0.65*<br>[0.46,0.90]    |
| Male                                 | 1.00                    | 1.00                    | 1.00                    | 1.00                    | 1.00                    | 1.00                    |
| <b>Assessment centre:</b> Manchester | -                       | -                       | -                       | -                       | -                       | -                       |
| Oxford                               | 1.13<br>[0.88,1.44]     | 1.10<br>[0.86,1.41]     | 1.06<br>[0.81,1.39]     | 1.10<br>[0.86,1.42]     | 1.06<br>[0.82,1.36]     | 1.03<br>[0.78,1.36]     |
| Stoke                                | 0.75<br>[0.40,1.41]     | 0.74<br>[0.39,1.40]     | 0.75<br>[0.40,1.42]     | 0.74<br>[0.39,1.40]     | 0.75<br>[0.39,1.42]     | 0.77<br>[0.40,1.46]     |
| Reading                              | 0.72<br>[0.36,1.45]     | 0.78<br>[0.39,1.56]     | 0.79<br>[0.39,1.58]     | 0.78<br>[0.39,1.57]     | 0.81<br>[0.40,1.62]     | 0.82<br>[0.41,1.65]     |
| Bury                                 | 0.60<br>[0.31,1.13]     | 0.63<br>[0.33,1.18]     | 0.62<br>[0.33,1.18]     | 0.63<br>[0.33,1.19]     | 0.62<br>[0.33,1.17]     | 0.62<br>[0.33,1.18]     |
| Newcastle                            | 0.41**<br>[0.22,0.76]   | 0.48*<br>[0.25,0.90]    | 0.48*<br>[0.26,0.91]    | 0.48*<br>[0.25,0.91]    | 0.48*<br>[0.25,0.91]    | 0.49*<br>[0.26,0.93]    |
| Leeds                                | 0.48*<br>[0.26,0.89]    | 0.50*<br>[0.27,0.91]    | 0.50*<br>[0.27,0.92]    | 0.50*<br>[0.27,0.91]    | 0.50*<br>[0.27,0.92]    | 0.50*<br>[0.27,0.93]    |
|                                      | 1.00                    | 1.00                    | 1.00                    | 1.00                    | 1.00                    | 1.00                    |
|                                      | -                       | -                       | -                       | -                       | -                       | -                       |
|                                      | 0.38***                 | 0.39***                 | 0.40***                 | 0.39***                 | 0.39***                 | 0.40***                 |

|                                                                |                        |                        |                        |                        |                        |                        |
|----------------------------------------------------------------|------------------------|------------------------|------------------------|------------------------|------------------------|------------------------|
|                                                                | [0.22,0.64]            | [0.23,0.67]            | [0.23,0.68]            | [0.23,0.67]            | [0.23,0.67]            | [0.23,0.68]            |
| Bristol                                                        | 0.24***<br>[0.13,0.45] | 0.26***<br>[0.14,0.49] | 0.26***<br>[0.14,0.50] | 0.26***<br>[0.14,0.49] | 0.26***<br>[0.14,0.49] | 0.27***<br>[0.14,0.50] |
| Barts                                                          | 0.19**<br>[0.07,0.54]  | 0.17***<br>[0.06,0.48] | 0.18**<br>[0.06,0.51]  | 0.17***<br>[0.06,0.49] | 0.18**<br>[0.06,0.50]  | 0.19**<br>[0.07,0.53]  |
| Nottingham                                                     | 0.30***<br>[0.15,0.58] | 0.31***<br>[0.16,0.61] | 0.32***<br>[0.16,0.62] | 0.32***<br>[0.16,0.61] | 0.32***<br>[0.16,0.61] | 0.32***<br>[0.17,0.62] |
| Sheffield                                                      | 0.81<br>[0.50,1.30]    | 0.83<br>[0.52,1.33]    | 0.85<br>[0.53,1.35]    | 0.83<br>[0.52,1.33]    | 0.84<br>[0.52,1.34]    | 0.85<br>[0.53,1.37]    |
| Liverpool                                                      | 0.86<br>[0.54,1.36]    | 0.85<br>[0.53,1.36]    | 0.87<br>[0.54,1.38]    | 0.85<br>[0.54,1.36]    | 0.84<br>[0.52,1.34]    | 0.86<br>[0.54,1.37]    |
| Middlesborough                                                 | 0.44*<br>[0.22,0.86]   | 0.45*<br>[0.23,0.88]   | 0.45*<br>[0.23,0.88]   | 0.45*<br>[0.23,0.88]   | 0.44*<br>[0.23,0.87]   | 0.45*<br>[0.23,0.88]   |
| Hounslow                                                       | 0.37**<br>[0.20,0.68]  | 0.36**<br>[0.19,0.66]  | 0.37**<br>[0.20,0.68]  | 0.36**<br>[0.19,0.67]  | 0.37**<br>[0.20,0.68]  | 0.38**<br>[0.20,0.70]  |
| Croydon                                                        | 0.36***<br>[0.20,0.65] | 0.35***<br>[0.19,0.63] | 0.36***<br>[0.20,0.66] | 0.35***<br>[0.19,0.64] | 0.34***<br>[0.19,0.63] | 0.36***<br>[0.20,0.66] |
| Birmingham                                                     | 0.41**<br>[0.23,0.75]  | 0.40**<br>[0.22,0.72]  | 0.42**<br>[0.23,0.76]  | 0.40**<br>[0.22,0.73]  | 0.40**<br>[0.22,0.71]  | 0.41**<br>[0.23,0.75]  |
| <b>Country of birth: UK &amp; Ireland</b>                      | 1.00<br>-              | 1.00<br>-              | 1.00<br>-              | 1.00<br>-              | 1.00<br>-              | 1.00<br>-              |
| Elsewhere                                                      | 1.06<br>[0.71,1.58]    | 1.07<br>[0.71,1.60]    | 0.99<br>[0.65,1.51]    | 1.07<br>[0.72,1.61]    | 1.07<br>[0.71,1.62]    | 1.02<br>[0.67,1.55]    |
| <b>Socioeconomic deprivation: Quartile 1 (most advantaged)</b> |                        | 1.00<br>-              | 1.00<br>-              | 1.00<br>-              | 1.00<br>-              | 1.00<br>-              |
| Quartile 2                                                     |                        | 1.34<br>[0.89,2.03]    | 1.32<br>[0.87,2.00]    | 1.34<br>[0.88,2.02]    | 1.32<br>[0.88,2.00]    | 1.31<br>[0.86,1.98]    |
| Quartile 3                                                     |                        | 1.60*<br>[1.08,2.37]   | 1.55*<br>[1.04,2.29]   | 1.59*<br>[1.07,2.35]   | 1.55*<br>[1.05,2.29]   | 1.50*<br>[1.01,2.22]   |
| Quartile 4 (least advantaged)                                  |                        | 1.86**<br>[1.26,2.73]  | 1.72**<br>[1.17,2.55]  | 1.84**<br>[1.25,2.70]  | 1.77**<br>[1.20,2.61]  | 1.65*<br>[1.11,2.45]   |
| <b>Education level: College or University degree</b>           |                        | 1.00<br>-              | 1.00<br>-              | 1.00<br>-              | 1.00<br>-              | 1.00<br>-              |
| A levels/AS levels or equivalent                               |                        | 0.99<br>[0.65,1.51]    | 0.92<br>[0.60,1.40]    | 0.98<br>[0.65,1.50]    | 0.95<br>[0.62,1.45]    | 0.89<br>[0.58,1.35]    |
| O levels/GCSEs/CSEs or equivalent                              |                        | 1.29                   | 1.12                   | 1.29                   | 1.21                   | 1.06                   |

|                                             |  |                     |                        |                     |                     |                       |
|---------------------------------------------|--|---------------------|------------------------|---------------------|---------------------|-----------------------|
|                                             |  | [0.97,1.71]         | [0.83,1.51]            | [0.97,1.71]         | [0.91,1.61]         | [0.79,1.43]           |
| Other                                       |  | 1.33<br>[0.89,2.00] | 1.12<br>[0.74,1.71]    | 1.33<br>[0.88,2.00] | 1.25<br>[0.83,1.89] | 1.06<br>[0.70,1.62]   |
| None of the above                           |  | 1.32<br>[0.79,2.21] | 1.11<br>[0.65,1.89]    | 1.31<br>[0.79,2.20] | 1.24<br>[0.73,2.09] | 1.04<br>[0.60,1.79]   |
| <b>Shiftwork: No</b>                        |  |                     | 1.00<br>-              |                     |                     | 1.00<br>-             |
| Yes                                         |  |                     | 1.68***<br>[1.25,2.24] |                     |                     | 1.63**<br>[1.22,2.19] |
| <b>Occupation: Non-manual</b>               |  |                     | 1.00<br>-              |                     |                     | 1.00<br>-             |
| Manual                                      |  |                     | 1.38*<br>[1.02,1.87]   |                     |                     | 1.40*<br>[1.03,1.89]  |
| <b>Job tenure (years): &lt;=10</b>          |  |                     | 1.00<br>-              |                     |                     | 1.00<br>-             |
| 11-20                                       |  |                     | 1.25<br>[0.94,1.65]    |                     |                     | 1.26<br>[0.96,1.67]   |
| >20                                         |  |                     | 0.78<br>[0.53,1.15]    |                     |                     | 0.78<br>[0.53,1.16]   |
| <b>Working hours/week: &lt;40</b>           |  |                     | 1.00<br>-              |                     |                     | 1.00<br>-             |
| 40-45                                       |  |                     | 0.91<br>[0.68,1.22]    |                     |                     | 0.90<br>[0.67,1.21]   |
| >45                                         |  |                     | 0.98<br>[0.69,1.39]    |                     |                     | 0.96<br>[0.67,1.36]   |
| <b>Number of chronic conditions: 0</b>      |  |                     |                        | 1.00<br>-           |                     | 1.00<br>-             |
| 1                                           |  |                     |                        | 1.26<br>[0.96,1.65] |                     | 1.22<br>[0.93,1.60]   |
| 2                                           |  |                     |                        | 0.99<br>[0.65,1.50] |                     | 0.93<br>[0.61,1.43]   |
| 3                                           |  |                     |                        | 1.05<br>[0.53,2.07] |                     | 0.95<br>[0.48,1.91]   |
| 4+                                          |  |                     |                        | 1.49<br>[0.64,3.48] |                     | 1.34<br>[0.57,3.13]   |
| <b>Long-standing illness/disability: No</b> |  |                     |                        | 1.00                |                     | 1.00                  |

|                                                      |        |        |        |                     |                       |                       |
|------------------------------------------------------|--------|--------|--------|---------------------|-----------------------|-----------------------|
|                                                      |        |        |        | -                   |                       | -                     |
| Yes                                                  |        |        |        | 1.07<br>[0.78,1.47] |                       | 1.05<br>[0.77,1.44]   |
| <b>Body Mass Index category:</b> Underweight (<18.5) |        |        |        |                     | 1.05<br>[0.15,7.50]   | 1.03<br>[0.15,7.30]   |
| Normal weight (18.5-24.9)                            |        |        |        |                     | 1.00<br>-             | 1.00<br>-             |
| Overweight (25.0-29.9)                               |        |        |        |                     | 1.44*<br>[1.07,1.93]  | 1.43*<br>[1.06,1.92]  |
| Obese (>=30.0)                                       |        |        |        |                     | 1.66**<br>[1.21,2.28] | 1.62**<br>[1.17,2.25] |
| <b>Smoking status:</b> Never                         |        |        |        |                     | 1.00<br>-             | 1.00<br>-             |
| Previous                                             |        |        |        |                     | 1.28<br>[0.97,1.69]   | 1.27<br>[0.96,1.68]   |
| Current                                              |        |        |        |                     | 0.93<br>[0.62,1.40]   | 0.89<br>[0.60,1.34]   |
| <b>Alcohol consumption:</b> Daily or almost daily    |        |        |        |                     | 1.00<br>-             | 1.00<br>-             |
| Three or four times a week                           |        |        |        |                     | 0.91<br>[0.60,1.40]   | 0.90<br>[0.59,1.39]   |
| Once or twice a week                                 |        |        |        |                     | 0.96<br>[0.64,1.44]   | 0.94<br>[0.63,1.41]   |
| One to three times a month                           |        |        |        |                     | 1.38<br>[0.89,2.13]   | 1.33<br>[0.86,2.06]   |
| Special occasions only                               |        |        |        |                     | 1.03<br>[0.62,1.69]   | 0.97<br>[0.59,1.60]   |
| Never (former drinker)                               |        |        |        |                     | 0.48<br>[0.17,1.36]   | 0.45<br>[0.16,1.29]   |
| Never                                                |        |        |        |                     | 1.15<br>[0.62,2.12]   | 1.08<br>[0.59,2.00]   |
| <b>Observations</b>                                  | 120075 | 120075 | 120075 | 120075              | 120075                | 120075                |

CI=confidence interval; RR=risk ratio; \*  $p < 0.05$ , \*\*  $p < 0.01$ , \*\*\*  $p < 0.001$

Model 1: Adjusted for age group, sex, country of birth; Model 2: Model 1 + socioeconomic deprivation quartile, education level; Model 3: Model 2 + shift work, manual work, job tenure, working hours; Model 4: Model 2 + number of chronic conditions, long-standing illness/disability; Model 5: Model 2 + BMI category, smoking status, alcohol consumption; Model 6: All covariates



Figure S2: Risk of severe COVID-19 by broad race/occupation groups

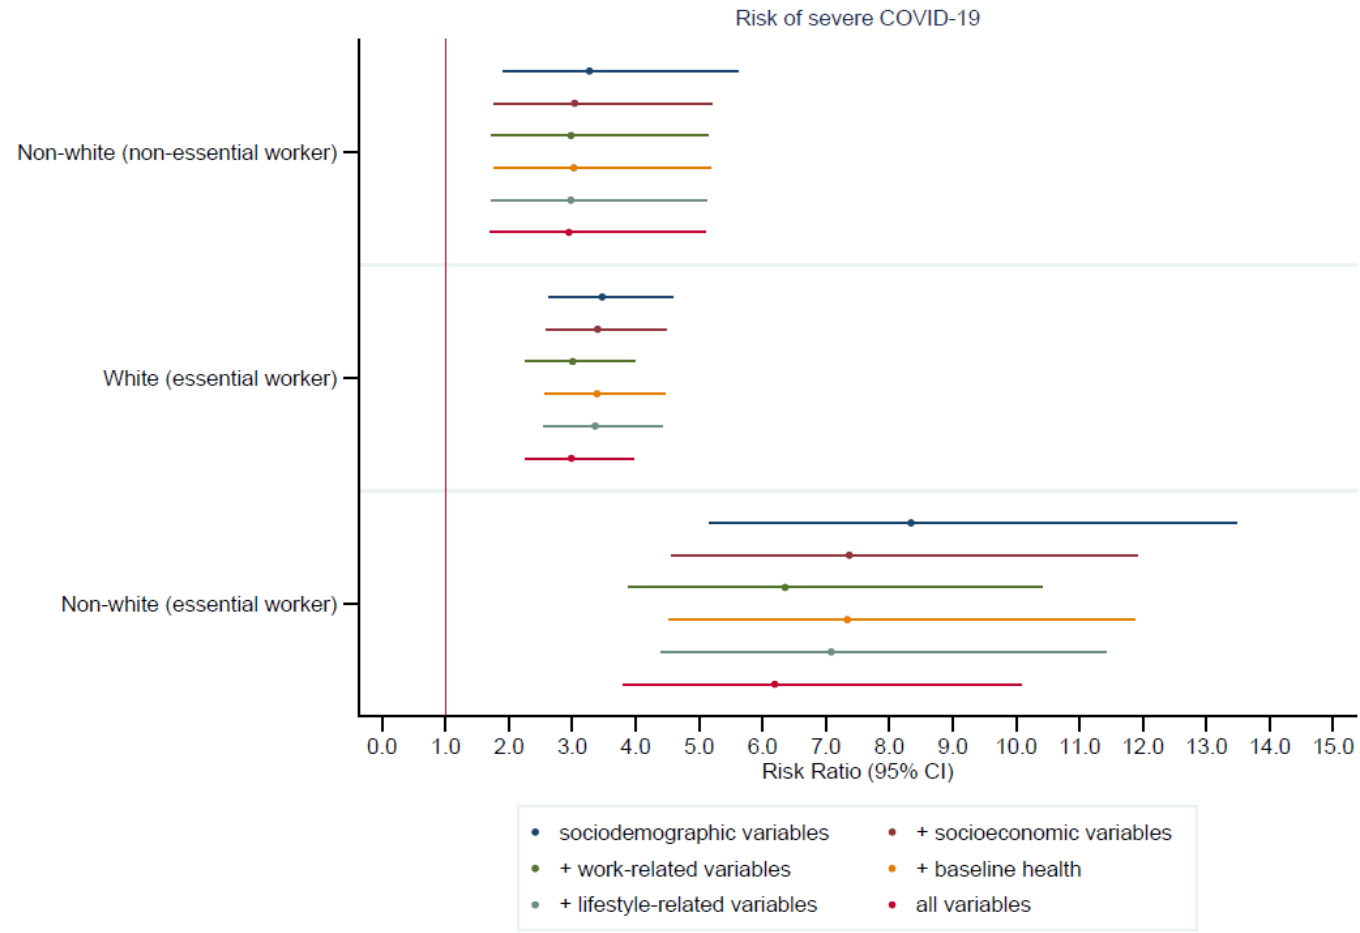

Reference: White (non-essential worker)
